# Supplementary material for: Morita–Baylis–Hillman adducts as effective dipolarophiles in Copper(i)-catalyzed 1,3-dipolar cycloaddition with azomethine ylides: asymmetric construction of pyrrolidine derivatives containing quaternary stereogenic center
Source: Royal Society of Chemistry journal article supplement (doi:10.1039/c1cc11138h), 2011-01-01
Supplement: c1cc11138h.pdf [file c1cc11138h.pdf]

**Morita-Baylis-Hillman Adducts as Effective Dipolarophiles in  
Cu(I)-Catalyzed 1,3-Dipolar Cycloaddition with Azomethine Ylides:  
Asymmetric Construction of Pyrrolidine Derivatives Containing  
Quaternary Stereogenic Center**

Huai-Long Teng, He Huang, Hai-Yan Tao and Chun-Jiang Wang\*

*E-mail:* [cjwang@whu.edu.cn](mailto:cjwang@whu.edu.cn)

**Supporting Information**

Table of Contents

|      |                                                                                                                                                                                                              |       |
|------|--------------------------------------------------------------------------------------------------------------------------------------------------------------------------------------------------------------|-------|
| I.   | General remarks                                                                                                                                                                                              | 2     |
| II.  | General procedure for asymmetric 1,3-dipolar cycloaddition of azomethine ylides with Morita-Baylis-Hillman adducts catalyzed by Cu(CH <sub>3</sub> CN) <sub>4</sub> BF <sub>4</sub> /TF-BiphamPhos complexes | 2-11  |
| III. | X-ray crystal structures of <b>5</b> (absolute configuration)                                                                                                                                                | 11    |
| IV.  | Proposed transition states leading to the <i>endo</i> -cycloadduct while using Morita-Baylis-Hillman adducts as the dipolarophiles                                                                           | 12    |
| V.   | References                                                                                                                                                                                                   | 13    |
| VI.  | <sup>1</sup> H NMR and <sup>13</sup> C NMR spectra                                                                                                                                                           | 14-43 |
| VII. | HPLC chromatograms                                                                                                                                                                                           | 44-71 |

## General Remarks.

<sup>1</sup>H NMR spectra were recorded on a VARIAN Mercury 300 MHz spectrometer in chloroform-d<sub>3</sub>. Chemical shifts are reported in ppm with the internal TMS signal at 0.0 ppm as a standard. The data are reported as (s = single, d = double, t = triple, q = quartet, m = multiple or unresolved, brs = broad singlet, coupling constant(s) in Hz, integration). <sup>13</sup>C NMR spectra were recorded on a VARIAN Mercury 100 MHz spectrometer in chloroform-d<sub>3</sub>. Chemical shifts are reported in ppm with the internal chloroform signal at 77.0 ppm as a standard. Commercially obtained reagents were used without further purification. All reactions were monitored by TLC with silica gel-coated plates. Diastereomeric ratios were determined from crude <sup>1</sup>H NMR or HPLC analysis. Enantiomeric ratios were determined by HPLC, using a Chiralcel AD-H column, a Chiralpak AS-H column with hexane and *i*-PrOH as solvents. Ligands **1a-e** were prepared according to the literature procedure reported by us.<sup>1</sup> Morita-Baylis-Hillman Adducts were prepared according to the literature procedure.<sup>2</sup> The racemic adducts were attained by using racemic AgOAc/PPh<sub>3</sub> as the catalyst. The absolute configuration of **5** was determined unequivocally according to the X-ray diffraction analysis, and those of other adducts were deduced on the basis of these results.

## General Procedure for Asymmetric 1,3-Dipolar Cycloaddition of Azomethine Ylides with Morita-Baylis-Hillman Adducts Catalyzed by Cu(I)/(*S*)-TF-BiphamPhos Complex in the Presence of Et<sub>3</sub>N as Base

Under argon atmosphere (*S*)-TF-BiphamPhos **1e** (5.3 mg, 0.0066 mmol) and Cu(CH<sub>3</sub>CN)<sub>4</sub>BF<sub>4</sub> (1.9 mg, 0.006 mmol) were dissolved in 2 mL DCM, and stirred at room temperature for about 1 h at room temperature. Then, imine substrate (0.40 mmol), Et<sub>3</sub>N (0.03 mmol) were added sequentially, the mixture was dropped to -20°C and Morita-Baylis-Hillman Adducts (0.20 mmol) was added. Once starting material was consumed (monitored by TLC), the mixture was filtered through celite and the filtrate was concentrated to dryness, the residue was purified by column chromatography to give the corresponding cycloaddition product, which was then

directly analyzed by chiral HPLC to determine the enantiomeric excess.

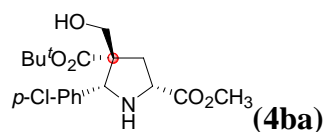

**(2R,4R,5R)-4-tert-butyl 2-methyl 5-(4-chlorophenyl)-4-(hydroxymethyl)-pyrrolidine-2,4-dicarboxylate**

The title compound was prepared according to the general procedure as described above in 88% yield. It was purified by flash chromatography to afford colorless oil.  $[\alpha]_D^{25} = +1.8$  (*c* 2.10, CHCl<sub>3</sub>); <sup>1</sup>H NMR (CDCl<sub>3</sub>, TMS, 300 MHz) δ 7.36 (d, *J* = 7.2 Hz, 2H), 7.28 (d, *J* = 7.2 Hz, 2H), 4.31 (s, 1H), 3.98 (t, *J* = 8.4 and 10.2 Hz, 1H), 3.89 (d, *J* = 11.4 Hz, 1H), 3.82 (s, 3H), 3.77 (d, *J* = 11.4 Hz, 1H), 2.64 (br, 1H), 2.58 (m, 2H), 2.32 (m, 1H), 1.09 (s, 9H); <sup>13</sup>C NMR (CDCl<sub>3</sub>, TMS, 100 MHz) δ 27.38, 37.02, 52.24, 58.56, 60.56, 66.00, 66.90, 81.91, 128.11, 129.01, 133.27, 138.02, 172.31, 173.58; IR (KBr) ν 3675, 3616, 3019, 2977, 2400, 1737, 1216, 757 cm<sup>-1</sup>. HRMS Calcd. For C<sub>18</sub>H<sub>24</sub>ClNO<sub>5</sub> + H<sup>+</sup>: 370.1416, found 370.1411. The product was analyzed by HPLC to determine the enantiomeric excess: 94% ee (Chiralcel AS-H, *i*-propanol/hexane = 10/90, flow rate 0.5 mL/min, λ = 210 nm); t<sub>r</sub> = 18.76 and 32.26 min.

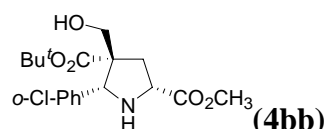

**(2R,4R,5R)-4-tert-butyl 2-methyl 5-(2-chlorophenyl)-4-(hydroxymethyl)-pyrrolidine-2,4-dicarboxylate**

The title compound was prepared according to the general procedure as described above in 85% yield. It was purified by flash chromatography to afford colorless oil.  $[\alpha]_D^{25} = -26.2$  (*c* 1.21, CHCl<sub>3</sub>); <sup>1</sup>H NMR (CDCl<sub>3</sub>, TMS, 300 MHz) δ 7.70 (d, *J* = 7.8 Hz, 1H), 7.15-7.35 (m, 3H), 4.86 (s, 1H), 4.12-4.00 (m, 2H), 3.80 (s, 3H), 3.75 (d, *J* = 11.1 Hz, 1H), 2.62 (t, *J* = 11.4 Hz, 1H), 2.38-2.46 (m, 2H), 1.06 (s, 9H); <sup>13</sup>C NMR (CDCl<sub>3</sub>, TMS, 100 MHz) δ 27.28, 35.58, 52.20, 58.45, 61.94, 65.91, 81.59, 126.90, 128.60, 129.09, 129.84, 133.65, 138.50, 171.31, 173.91; IR (KBr) ν 3683, 3621,

3019, 2977, 2400, 1736, 1216, 757  $\text{cm}^{-1}$ . HRMS Calcd. For  $\text{C}_{18}\text{H}_{24}\text{ClNO}_5 + \text{H}^+$ : 370.1416, found 370.1416. The product was analyzed by HPLC to determine the enantiomeric excess: 92% ee (Chiralcel AS-H, *i*-propanol/hexane = 20/80, flow rate 0.5 mL/min,  $\lambda = 210 \text{ nm}$ );  $t_r = 11.40$  and 20.42 min.

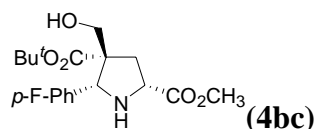

**(2R,4R,5R)-4-tert-butyl 2-methyl 5-(4-fluorophenyl)-4-(hydroxymethyl)-pyrrolidine-2,4-dicarboxylate**

The title compound was prepared according to the general procedure as described above in 72% yield. It was purified by flash chromatography to afford colorless oil.  $[\alpha]_D^{25} = +1.2$  (*c* 0.79,  $\text{CHCl}_3$ );  $^1\text{H NMR}$  ( $\text{CDCl}_3$ , TMS, 300 MHz)  $\delta$  7.36 (m, 2H), 6.99 (t,  $J = 8.7 \text{ Hz}$  and  $8.4 \text{ Hz}$ , 2H), 4.28 (s, 1H), 3.97-3.86 (m, 2H), 3.80 (s, 3H), 3.74 (d,  $J = 11.7 \text{ Hz}$ , 1H), 2.68 (br, 1H), 2.54 (m, 1H), 2.32 (m, 1H), 1.08 (s, 9H);  $^{13}\text{C NMR}$  ( $\text{CDCl}_3$ , TMS, 100 MHz)  $\delta$  27.75, 37.43, 52.57, 58.93, 60.86, 66.66, 67.38, 82.28, 115.05, 115.33, 129.53, 129.64, 172.79, 173.88; IR (KBr)  $\nu$  3684, 3620, 3019, 2896, 2400, 1737, 1217, 758  $\text{cm}^{-1}$ . HRMS Calcd. For  $\text{C}_{18}\text{H}_{24}\text{FNO}_5 + \text{H}^+$ : 354.1711, found 354.1713. The product was analyzed by HPLC to determine the enantiomeric excess: 95% ee (Chiralcel AS-H, *i*-propanol/hexane = 20/80, flow rate 0.5 mL/min,  $\lambda = 210 \text{ nm}$ );  $t_r = 11.29$  and 15.97 min.

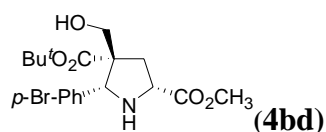

**(2R,4R,5R)-4-tert-butyl 2-methyl 5-(4-bromophenyl)-4-(hydroxymethyl)-pyrrolidine-2,4-dicarboxylate**

The title compound was prepared according to the general procedure as described above in 80% yield. It was purified by flash chromatography to afford colorless oil.  $[\alpha]_D^{25} = -3.0$  (*c* 1.24,  $\text{CHCl}_3$ );  $^1\text{H NMR}$  ( $\text{CDCl}_3$ , TMS, 300 MHz)  $\delta$  7.43 (d,  $J = 8.1 \text{ Hz}$ , 2H), 7.29 (d,  $J = 8.7 \text{ Hz}$ , 2H), 4.27 (s, 1H), 3.96 (m, 1H), 3.88 (d,  $J = 11.1 \text{ Hz}$ , 1H), 3.81 (s, 3H), 3.75 (d,  $J = 11.1 \text{ Hz}$ , 1H), 2.73 (br, 1H), 2.54 (m, 1H), 2.32 (m, 1H), 1.09

(s, 9H);  $^{13}\text{C}$  NMR ( $\text{CDCl}_3$ , TMS, 100 MHz)  $\delta$  27.53, 37.20, 52.40, 58.72, 60.78, 66.34, 67.15, 82.15, 121.54, 129.51, 131.21, 138.70, 172.50, 173.68; IR (KBr)  $\nu$  3684, 3620, 3019, 2976, 2400, 1737, 1217, 741  $\text{cm}^{-1}$ . HRMS Calcd. For  $\text{C}_{18}\text{H}_{24}\text{BrNO}_5 + \text{H}^+$ : 414.0911, found 414.0912. The product was analyzed by HPLC to determine the enantiomeric excess: 90% ee (Chiralcel AS-H, *i*-propanol/hexane = 20/80, flow rate 0.5 mL/min,  $\lambda$  = 210 nm);  $t_r$  = 11.27 and 16.96 min.

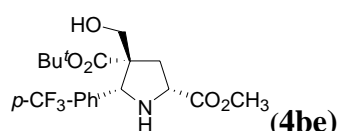

**(2R,4R,5R)-4-tert-butyl 2-methyl 4-(hydroxymethyl)-5-(4-(trifluoromethyl)phenyl)pyrrolidine-2,4-dicarboxylate**

The title compound was prepared according to the general procedure as described above in 88% yield. It was purified by flash chromatography to afford colorless oil.  $[\alpha]_D^{25} = +2.5$  (*c* 1.05,  $\text{CHCl}_3$ );  $^1\text{H}$  NMR ( $\text{CDCl}_3$ , TMS, 300 MHz)  $\delta$  7.57 (s, 4H), 4.42 (s, 1H), 4.01 (t,  $J$  = 9.0 Hz and 8.7Hz, 1H), 3.90 (d,  $J$  = 11.7 Hz, 1H), 3.82 (s, 3H), 3.80 (d,  $J$  = 11.7 Hz, 1H), 2.90 (br, 1H), 2.57 (m, 1H), 2.32 (m, 1H), 1.04 (s, 9H);  $^{13}\text{C}$  NMR ( $\text{CDCl}_3$ , TMS, 100 MHz)  $\delta$  27.78, 37.39, 52.80, 59.16, 61.09, 66.69, 67.46, 82.61, 125.41, 128.60, 144.40, 172.77, 174.01; IR (KBr)  $\nu$  3684, 3620, 3019, 2977, 2400, 1738, 1216, 757  $\text{cm}^{-1}$ . HRMS Calcd. For  $\text{C}_{19}\text{H}_{24}\text{F}_3\text{NO}_5 + \text{H}^+$ : 404.1679, found 404.1682. The product was analyzed by HPLC to determine the enantiomeric excess: 97% ee (Chiralcel AS-H, *i*-propanol/hexane = 20/80, flow rate 0.5 mL/min,  $\lambda$  = 210 nm);  $t_r$  = 9.21 and 12.88 min.

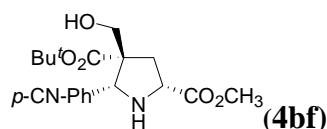

**(2R,4R,5R)-4-tert-butyl 2-methyl 5-(4-cyanophenyl)-4-(hydroxymethyl)pyrrolidine-2,4-dicarboxylate**

The title compound was prepared according to the general procedure as described above in 65% yield. It was purified by flash chromatography to afford colorless oil.  $[\alpha]_D^{25} = +6.4$  (*c* 0.57,  $\text{CHCl}_3$ );  $^1\text{H}$  NMR ( $\text{CDCl}_3$ , TMS, 300 MHz)  $\delta$  7.56 (s, 4H), 4.42

(s, 1H), 4.00 (m, 1H), 3.86 (d,  $J = 11.7$  Hz, 1H), 3.82 (s, 3H), 3.79 (d,  $J = 11.7$  Hz, 1H), 2.73 (br, 1H), 2.55 (m, 1H), 2.32 (m, 1H), 1.06 (s, 9H);  $^{13}\text{C}$  NMR ( $\text{CDCl}_3$ , TMS, 100 MHz)  $\delta$  27.69, 36.87, 52.63, 58.85, 60.77, 66.38, 67.08, 82.53, 111.45, 119.01, 128.97, 132.07, 145.96, 172.43, 173.77; IR (KBr)  $\nu$  3423, 3055, 2985, 1720, 1265, 739  $\text{cm}^{-1}$ . The product was analyzed by HPLC to determine the enantiomeric excess: 92% ee (Chiralcel AD-H, *i*-propanol/hexane = 20/80, flow rate 0.5 mL/min,  $\lambda = 230$  nm);  $t_r = 25.38$  and 29.42 min.

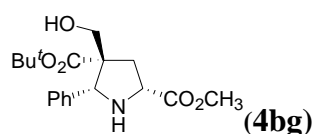

**(2R,4R,5R)-4-tert-butyl 2-methyl 4-(hydroxymethyl)-5-phenyl pyrrolidine-2,4-dicarboxylate**

The title compound was prepared according to the general procedure as described above in 65% yield. It was purified by flash chromatography to afford colorless oil.  $[\alpha]_D^{25} = +6.4$  ( $c$  0.57,  $\text{CHCl}_3$ );  $^1\text{H}$  NMR ( $\text{CDCl}_3$ , TMS, 300 MHz)  $\delta$  7.39-7.24 (m, 5H), 4.28 (s, 1H), 4.02-3.94 (m, 2H), 3.82 (s, 3H), 3.75 (d,  $J = 11.7$  Hz, 1H), 2.86 (br, 1H), 2.55 (m, 1H), 2.36 (m, 1H), 1.06 (s, 9H);  $^{13}\text{C}$  NMR ( $\text{CDCl}_3$ , TMS, 100 MHz)  $\delta$  27.07, 37.25, 51.97, 58.51, 60.54, 66.11, 67.57, 81.43, 127.24, 127.35, 127.85, 138.88, 172.24, 173.33; IR (KBr)  $\nu$  3683, 3621, 3019, 2976, 1710, 1216, 776  $\text{cm}^{-1}$ . HRMS Calcd. For  $\text{C}_{19}\text{H}_{24}\text{F}_3\text{NO}_5 + \text{H}^+$ : 336.1806, found 336.1815. The product was analyzed by HPLC to determine the enantiomeric excess: 97% ee (Chiralcel AS-H, *i*-propanol/hexane = 20/80, flow rate 0.5 mL/min,  $\lambda = 210$  nm);  $t_r = 10.46$  and 16.22 min.

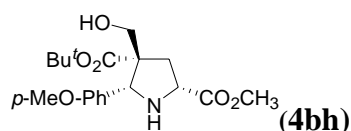

**(2R,4R,5R)-4-tert-butyl 2-methyl 4-(hydroxymethyl)-5-(4-methoxyphenyl) pyrrolidine-2,4-dicarboxylate**

The title compound was prepared according to the general procedure as described above in 70% yield. It was purified by flash chromatography to afford colorless oil.

$[\alpha]_D^{25} = +6.3$  (*c* 0.51, CHCl<sub>3</sub>); <sup>1</sup>H NMR (CDCl<sub>3</sub>, TMS, 300 MHz) δ 7.29 (d, *J* = 9.0 Hz, 2H), 6.84 (d, *J* = 8.7 Hz, 2H), 4.22 (s, 1H), 4.00-3.91 (m, 2H), 3.81 (s, 3H), 3.78 (s, 3H), 3.73 (d, *J* = 11.1 Hz, 1H), 2.82 (br, 1H), 2.54 (m, 1H), 2.35(m, 1H), 1.10 (s, 9H); <sup>13</sup>C NMR (CDCl<sub>3</sub>, TMS, 100 MHz) δ 27.32, 37.34, 52.09, 55.10, 58.56, 60.64, 66.26, 67.38, 81.57, 108.63, 113.30, 128.50, 131.06, 158.92, 172.48; IR (KBr) ν 3684, 3620, 3019, 2976, 2400, 1737, 1516, 1217, 743 cm<sup>-1</sup>. HRMS Calcd. For C<sub>19</sub>H<sub>24</sub>F<sub>3</sub>NO<sub>5</sub> + H<sup>+</sup>: 366.1911, found 366.1915. The product was analyzed by HPLC to determine the enantiomeric excess: 95% ee (Chiralcel OD-H, *i*-propanol/hexane = 20/80, flow rate 0.5 mL/min, λ = 210 nm); t<sub>r</sub> = 19.42 and 26.06 min.

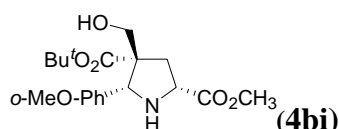

**(2*R*,4*R*,5*R*)-4-*tert*-butyl 2-methyl 4-(hydroxymethyl)-5-(2-methoxyphenyl) pyrrolidine-2,4-dicarboxylate**

The title compound was prepared according to the general procedure as described above in 68% yield. It was purified by flash chromatography to afford colorless oil.  $[\alpha]_D^{25} = -32.1$  (*c* 0.55, CHCl<sub>3</sub>); <sup>1</sup>H NMR (CDCl<sub>3</sub>, TMS, 300 MHz) δ 7.45 (d, *J* = 7.5 Hz, 1H), 7.22 (t, *J* = 12 Hz and 7.8 Hz, 1H), 6.94 (t, *J* = 7.2 Hz and 7.5 Hz, 1H), 6.82 (d, *J* = 12.9 Hz, 1H), 4.55 (s, 1H), 4.02-3.90 (m, 2H), 3.79 (s, 6H), 3.65 (d, *J* = 11.1 Hz, 1H), 2.66-2.46 (m, 3H), 1.08 (s, 9H); <sup>13</sup>C NMR (CDCl<sub>3</sub>, TMS, 100 MHz) δ 27.28, 37.38, 51.98, 54.95, 58.60, 61.14, 65.45, 80.99, 110.01, 120.36, 126.80, 128.41, 156.68, 172.23, 173.59; IR (KBr) ν 3423, 3055, 2985, 1720, 1265, 739 cm<sup>-1</sup>. The product was analyzed by HPLC to determine the enantiomeric excess: 86% ee (Chiralcel OD-H, *i*-propanol/hexane = 20/80, flow rate 0.5 mL/min, λ = 210 nm); t<sub>r</sub> = 13.83 and 21.54 min.

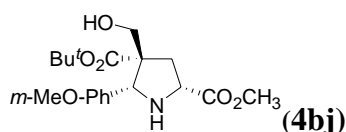

**(2*R*,4*R*,5*R*)-4-*tert*-butyl 2-methyl 4-(hydroxymethyl)-5-(3-methoxyphenyl) pyrrolidine-2,4-dicarboxylate**

The title compound was prepared according to the general procedure as described above in 72% yield. It was purified by flash chromatography to afford colorless oil.  $[\alpha]_D^{25} = +5.6$  (*c* 0.55,  $\text{CHCl}_3$ );  $^1\text{H}$  NMR ( $\text{CDCl}_3$ , TMS, 300 MHz)  $\delta$  7.27-7.18 (m, 1H), 6.94 (m, 1H), 6.79 (d,  $J = 7.8$  Hz, 1H), 4.26 (s, 1H), 3.97-3.92 (m, 2H), 3.80 (s, 3H), 3.79 (s, 3H), 3.74 (d,  $J = 11.4$  Hz, 1H), 2.64-2.35 (m, 3H), 1.08 (s, 9H);  $^{13}\text{C}$  NMR ( $\text{CDCl}_3$ , TMS, 100 MHz)  $\delta$  27.90, 37.99, 52.77, 55.70, 59.26, 61.29, 66.92, 68.27, 82.24, 113.62, 113.70, 120.29, 129.60, 141.49, 159.86, 173.11, 174.22; IR (KBr)  $\nu$  3423, 3055, 2985, 1720, 1265, 739  $\text{cm}^{-1}$ . The product was analyzed by HPLC to determine the enantiomeric excess: 86% ee (Chiralcel AS-H, *i*-propanol/hexane = 20/80, flow rate 0.5 mL/min,  $\lambda = 210$  nm);  $t_r = 15.10$  and 19.92 min.

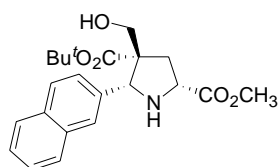

(4bk)

**(2*R*,4*R*,5*R*)-4-*tert*-butyl 2-methyl 4-(hydroxymethyl)-5-(3-methoxyphenyl)pyrrolidine-2,4-dicarboxylate**

The title compound was prepared according to the general procedure as described above in 72% yield. It was purified by flash chromatography to afford colorless oil.  $[\alpha]_D^{25} = +3.3$  (*c* 1.12,  $\text{CHCl}_3$ );  $^1\text{H}$  NMR ( $\text{CDCl}_3$ , TMS, 300 MHz)  $\delta$  7.84-7.75 (m, 4H), 7.46 (m, 3H), 4.53 (s, 1H), 4.11 (t,  $J = 8.7$  Hz and 8.7 Hz, 1H), 4.00 (d,  $J = 11.4$  Hz, 1H), 3.84 (d,  $J = 11.4$  Hz, 1H), 3.83 (s, 3H), 2.69-2.60 (m, 2H), 2.41-2.48 (m, 1H), 0.91 (s, 9H);  $^{13}\text{C}$  NMR ( $\text{CDCl}_3$ , TMS, 100 MHz)  $\delta$  27.27, 37.60, 52.23, 58.77, 60.84, 66.29, 67.94, 80.70, 125.69, 125.78, 126.04, 126.22, 127.43, 127.64, 127.82, 132.80, 132.95, 136.55, 172.56, 173.65; IR (KBr)  $\nu$  3683, 3620, 3019, 2976, 2400, 1736, 1522, 1216, 751  $\text{cm}^{-1}$ . The product was analyzed by HPLC to determine the enantiomeric excess: 91% ee (Chiralcel AS-H, *i*-propanol/hexane = 20/80, flow rate 0.5 mL/min,  $\lambda = 254$  nm);  $t_r = 11.89$  and 21.25 min.



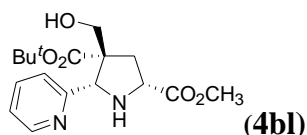

**(2*R*,4*R*,5*R*)-4-*tert*-butyl 2-methyl 4-(hydroxymethyl)-5-(pyridin-2-yl)pyrrolidine-2,4-dicarboxylate**

The title compound was prepared according to the general procedure as described above in 41% yield. It was purified by flash chromatography to afford colorless oil.  $[\alpha]_D^{25} = +0.1$  (*c* 0.55, CHCl<sub>3</sub>); <sup>1</sup>H NMR (CDCl<sub>3</sub>, TMS, 300 MHz) δ 8.65 (s, 1H), 8.51 (d, *J* = 3.6 Hz, 1H), 7.85 (d, *J* = 7.8 Hz, 1H), 7.27 (s, 1H), 4.42 (s, 1H), 4.02 (m, 1H), 3.95-3.82 (m, 5H), 2.76 (br, 1H), 2.56 (m, 1H), 2.35 (m, 1H), 1.08 (s, 9H); <sup>13</sup>C NMR (CDCl<sub>3</sub>, TMS, 100 MHz) δ 27.64, 36.81, 52.50, 58.88, 60.88, 65.23, 65.91, 82.27, 123.44, 135.71, 148.80, 149.38, 172.32, 173.80; IR (KBr) ν 3684, 3620, 3019, 2976, 2400, 1736, 1521, 1218, 1046, 743 cm<sup>-1</sup>. The product was analyzed by HPLC to determine the enantiomeric excess: 72% ee (Chiralcel AS-H, *i*-propanol/hexane = 20/80, flow rate 0.5 mL/min, λ = 254 nm); t<sub>r</sub> = 15.30 and 18.62 min.

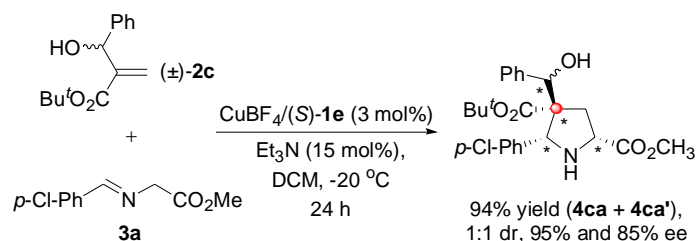

**(2*R*,4*R*,5*R*)-4-*tert*-butyl 2-methyl 5-(4-chlorophenyl)-4-((*S*)-hydroxy(phenyl)methyl)pyrrolidine-2,4-dicarboxylate **4ca** and (2*R*,4*R*,5*R*)-4-*tert*-butyl 2-methyl 5-(4-chlorophenyl)-4-((*R*)-hydroxy(phenyl)methyl) pyrrolidine-2,4-dicarboxylate **4ca'****

The title compounds **4ca** and **4ca'** were prepared according to the general procedure as described above and separated by silica gel column as colorless oil, and the absolute configuration of the stereogenic center bearing hydroxyl group has not been determined. For one diastereomer:  $[\alpha]_D^{25} = -4.2$  (*c* 0.46, CHCl<sub>3</sub>); <sup>1</sup>H NMR (CDCl<sub>3</sub>, TMS, 300 MHz) δ 7.46-7.26 (m, 9H), 4.88 (s, 1H), 4.85 (s, 1H), 3.85 (t, *J* = 9.3 Hz and

8.1 Hz, 1H), 3.78 (s, 3H), 2.54 (m, 1H), 2.45 (m, 1H), 1.04 (s, 9H);  $^{13}\text{C}$  NMR ( $\text{CDCl}_3$ , TMS, 100 MHz)  $\delta$  27.37, 35.24, 52.32, 58.36, 63.98, 67.89, 76.70, 82.95, 127.38, 128.15, 128.40, 129.74, 133.32, 139.69, 140.44, 172.68, 174.19; IR (KBr)  $\nu$  3683, 3620, 3019, 2976, 2400, 1736, 1521, 1423, 1217, 759  $\text{cm}^{-1}$ . The product was analyzed by HPLC to determine the enantiomeric excess: 95% ee (Chiralcel AD-H, *i*-propanol/hexane = 30/70, flow rate 1.0 mL/min,  $\lambda$  = 210 nm);  $t_r$  = 7.06 and 20.49 min. For the other diastereomer:  $[\alpha]_D^{25} = -2.9$  ( $c$  1.01,  $\text{CHCl}_3$ );  $^1\text{H}$  NMR ( $\text{CDCl}_3$ , TMS, 300 MHz)  $\delta$  7.39-7.26 (m, 9H), 5.21 (s, 1H), 4.84 (s, 1H), 3.83 (m, 1H), 3.76 (s, 3H), 2.72-2.52 (m, 2H), 0.97 (s, 9H);  $^{13}\text{C}$  NMR ( $\text{CDCl}_3$ , TMS, 100 MHz)  $\delta$  27.34, 33.21, 46.20, 52.24, 58.30, 64.23, 66.89, 74.85, 82.02, 89.19, 127.66, 128.23, 129.20, 133.40, 138.03, 140.71, 143.50, 170.91, 174.09; IR (KBr)  $\nu$  3684, 3620, 3019, 2975, 2400, 1736, 1520, 1422, 1216, 1046, 762  $\text{cm}^{-1}$ . The product was analyzed by HPLC to determine the enantiomeric excess: 85% ee (Chiralcel AS-H, *i*-propanol/hexane = 10/90, flow rate 0.5 mL/min,  $\lambda$  = 210 nm);  $t_r$  = 16.39 and 30.48 min.

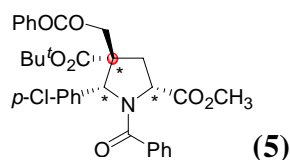

**(2*R*,4*R*,5*R*)-4-*tert*-butyl 2-methyl 1-benzoyl-4-(benzoyloxymethyl)-5-(4-chlorophenyl)pyrrolidine-2,4-dicarboxylate**

Under argon atmosphere **4ba** (369 mg, 1 mmol) was dissolved in 5 mL DCM, and  $\text{PhCOCl}$  (352 mg, 2.5 mmol), TEA (252 mg, 2.5 mmol) were added sequentially. The mixture was stirred at room temperature for 4h. Once starting material was consumed (monitored by TLC), the residue was purified by column chromatography to give **5** in 94% yield, which was then directly analyzed by chiral HPLC to determine the enantiomeric excess.  $[\alpha]_D^{25} = -10.6$  ( $c$  1.00,  $\text{CHCl}_3$ );  $^1\text{H}$  NMR ( $\text{CDCl}_3$ , TMS, 300 MHz)  $\delta$  7.98 (d,  $J$  = 7.8 Hz, 1H), 7.62-7.01 (m, 13H), 4.74 (m, 2H), 4.55 (s, 1H), 4.43 (m, 1H), 3.88 (s, 3H), 2.88 (t,  $J$  = 12.9 Hz and 12.0 Hz, 1H), 2.62 (s, 1H), 1.06 (s, 9H);  $^{13}\text{C}$  NMR ( $\text{CDCl}_3$ , TMS, 100 MHz)  $\delta$  27.42, 30.52, 52.61, 58.29, 59.66, 66.30, 67.54, 82.61, 126.65, 128.13, 128.44, 128.62, 129.06, 129.63, 129.96, 130.07, 133.62,

134.13, 135.28, 137.31, 165.84, 167.77, 171.50, 172.15; IR (KBr)  $\nu$  3683, 3620, 3019, 2977, 2400, 1737, 1436, 1370, 1216, 1046, 758  $\text{cm}^{-1}$ . The product was analyzed by HPLC to determine the enantiomeric excess: 94% ee (Chiralcel AD-H, *i*-propanol/hexane = 20/80, flow rate 0.5 mL/min,  $\lambda$  = 210 nm);  $t_r$  = 19.86 and 24.18 min.

**The absolute configuration of the cycloadduct (2*R*,4*R*,5*R*)-5 was determined by X-ray diffraction analysis**

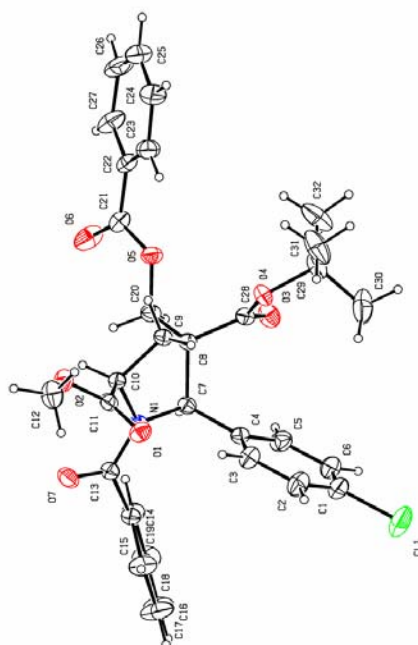

**Figure 1.** X-ray structure of (2*R*,4*R*,5*R*)-5

Crystal data for (2*R*,4*R*,5*R*)-5:  $\text{C}_{32}\text{H}_{32}\text{ClNO}_7$ ,  $M_r = 578.04$ ,  $T = 293$  K, Orthorhombic, space group  $P2(1)2(1)2$ ,  $a = 19.401(3)$ ,  $b = 24.000(6)$ ,  $c = 6.6143(9)$  Å,  $V = 3079.8(7)$  Å<sup>3</sup>,  $Z = 4$ , 6359 reflections measured, 4817 unique ( $R_{\text{int}} = 0.0412$ ) which were used in all calculations. The final  $wR_2 = 0.0844$  (all data). Flack  $\chi = 0.03(8)$ . CCDC 813952 contains the supplementary crystallographic data for this paper. These data can be obtained free of charge via [www.ccdc.cam.ac.uk/conts/retrieving.html](http://www.ccdc.cam.ac.uk/conts/retrieving.html) (or from the

Cambridge Crystallographic Data Centre, 12, Union Road, Cambridge CB21EZ, UK;  
fax: (+44) 1223-336-033; or [deposit@ccdc.cam.ac.uk](mailto:deposit@ccdc.cam.ac.uk).

### Proposed transition state of the *endo*-selectivity for asymmetric 1,3-dipolar cycloaddition of imino esters with Morita-Baylis-Hillman adduct

Based on the relative and absolute configuration of (2*R*,4*R*,5*R*)-**5** and previous studies,<sup>[1,3]</sup> a plausible transition state accounting for the observed *endo*-selectivity of the 1,3-DC addition of imino esters with Morita-Baylis-Hillman adduct in the presence of Cu(CH<sub>3</sub>CN)<sub>4</sub>BF<sub>4</sub>/(*S*)-TF-BiphamPhos (**1a**) is shown in Figure 2. The *in situ*-formed azomethine ylide is coordinated to the metallic center and oriented in such way because of the steric repulsion between the phenyl group in the ylide and the phenyl ring on the phosphorus atom of the chiral ligand, and the MBH adduct **2** approached the *Si* (C=N) face of the azomethine ylide and forms the *endo*-cycloadduct, which is compatible with the experimental results. The carbonyl group of Morita-Baylis-Hillman adduct could coordinate with the Cu(I) center, which can stabilize the negatively charged oxygen atom in the proposed transition states.<sup>[4]</sup> It could not rule out the possible hydrogen bond interaction between the carbonyl group of dipolarophile (**2**) and the NH<sub>2</sub> group of the chiral (*S*)-TF-BiphamPhos ligand (**1a**), which also facilitates stabilizing the proposed transition states.<sup>[3b,3c]</sup> Nevertheless, the real catalytic mechanism still needs further investigation.

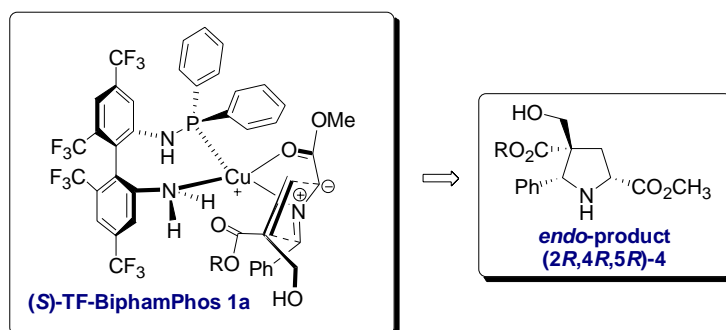

**Figure 2.** Proposed transition states leading to *endo*-(2*R*,4*R*,5*R*)-cycloadduct while using Morita-Baylis-Hillman adducts as the dipolarophiles.

## References

1. a) C.-J. Wang, G. Liang, Z.-Y. Xue, F. Gao, *J. Am. Chem. Soc.* **2008**, *130*, 17250; b) C.-J. Wang, Z.-Y. Xue, G. Liang, Z. Lu, *Chem. Commun.* **2009**, 2905; c) G. Liang, M.-C. Tong, C.-J. Wang, *Adv. Synth. Catal.* **2009**, *351*, 3101; d) Z.-Y. Xue, T.-L. Liu, Z. Lu,; H. Huang, H.-Y. Tao, C.-J. Wang, *Chem. Commun.* **2010**, *46*, 1727.
2. a) H. Huang, X. Liu, J. Deng, M. Qiu and Z. Zheng, *Organic. Letters.*, **2006**, *8*, 3359; b) W. -D. Lee, K. -S. Yang and K. Chen, *Chem. Commun.*, 2001, 1612.
- 3 a) S. Cabrera, R. G. Arrayás, B. Martín-Matute, F. P. Cossío, J. C. Carretero, *Tetrahedron* **2007**, *63*, 6587; b) W. Zeng, G.-Y. Chen, Y.-G. Zhou, Y.-X. Li, *J. Am. Chem. Soc.* **2007**, *129*, 750; c) H. Y. Kim, H.-J. Shih, W. E. Knabe, K. Oh, *Angew. Chem., Int. Ed.* **2009**, *48*, 7420; d) J. M. Longmire, B. Wang, X. Zhang, *J. Am. Chem. Soc.* **2002**, *124*, 13400; e) W. Gao, X. Zhang, M. Raghunath, *Org. Lett.* **2005**, *7*, 4241.
- 4 X.-X. Yan, Q. Peng, Y. Zhang, K. Zhang, W. Hong, X.-L. Hou, Y.-D. Wu, *Angew. Chem., Int. Ed.* **2006**, *45*, 1979.

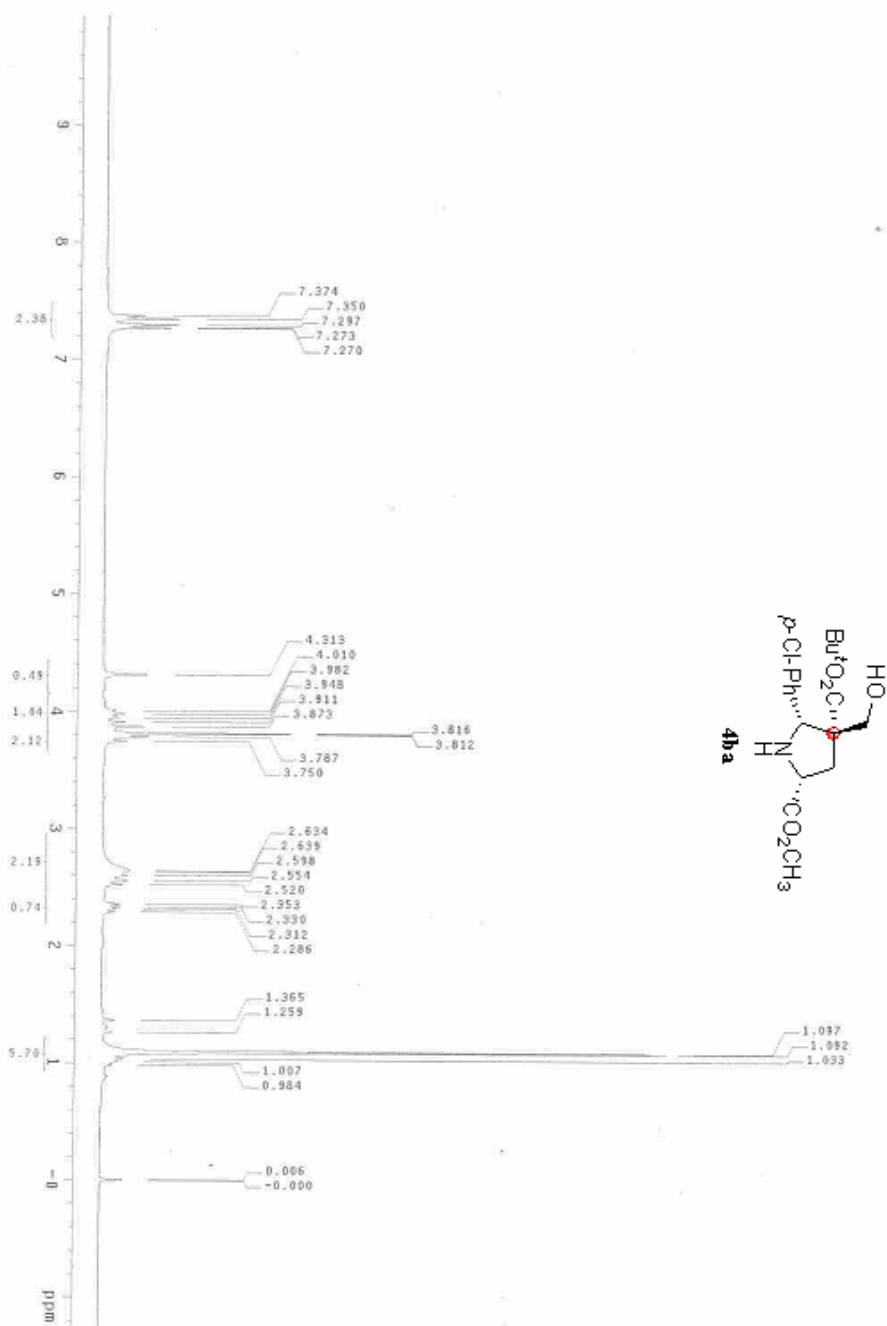



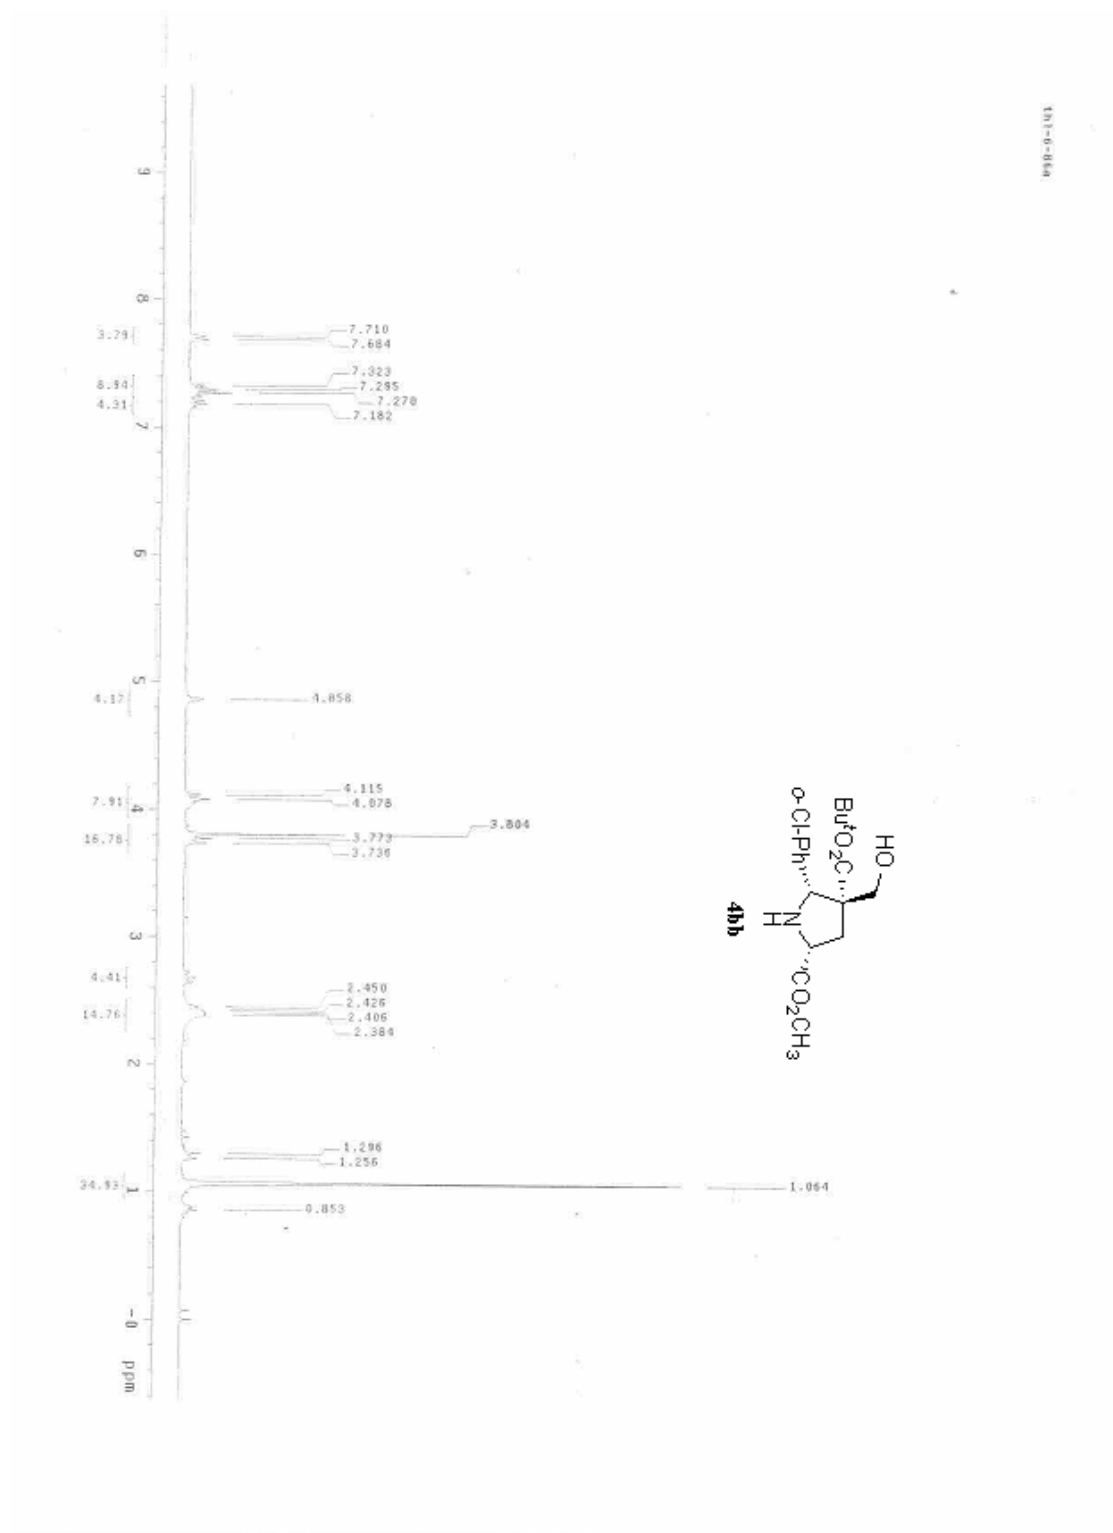



Solvent: CDCl3  
Ambient temperature  
Mercury-30008 "Mercury300"  
Relax-delay: 1.000 sec  
Pulse: 28.0 degree  
Acq: 1.000 sec  
Width: 1724.4 Hz  
100 Repetitions  
OBSERVE: C13, 75.4953033 MHz  
PULSEPRG: zgpg300.0021162 MHz  
Power: 0.00  
continously on  
DATA PROCESSING  
WALTZ-16 modulated  
F1: 152.832758  
Total Time: 1 hr., 28 min., 23 sec

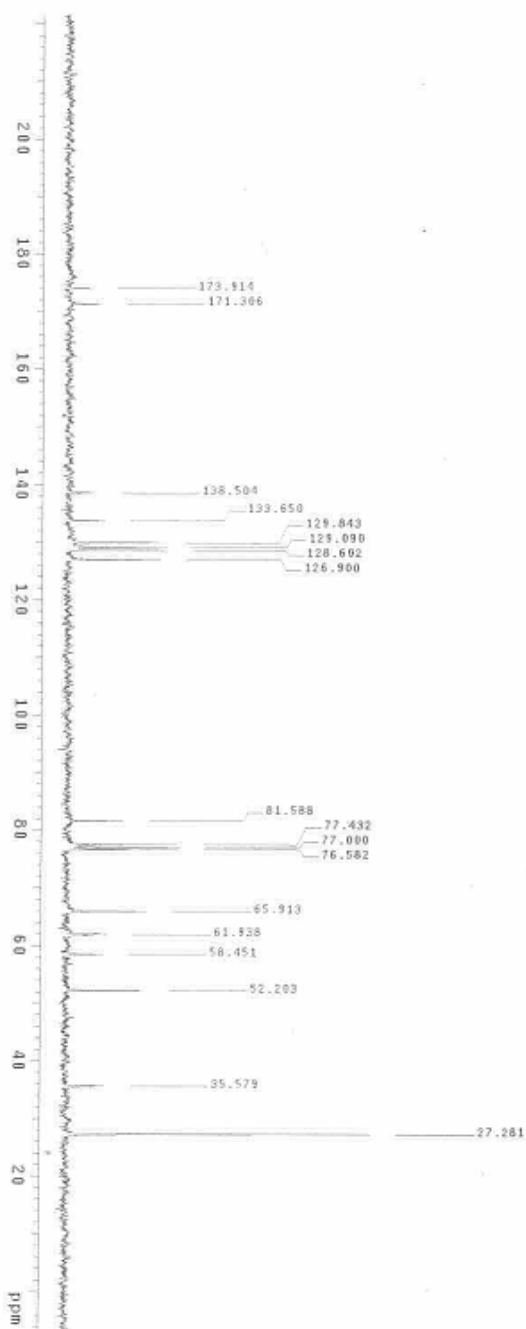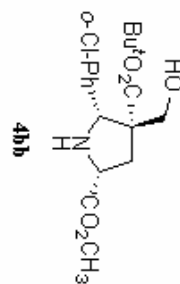

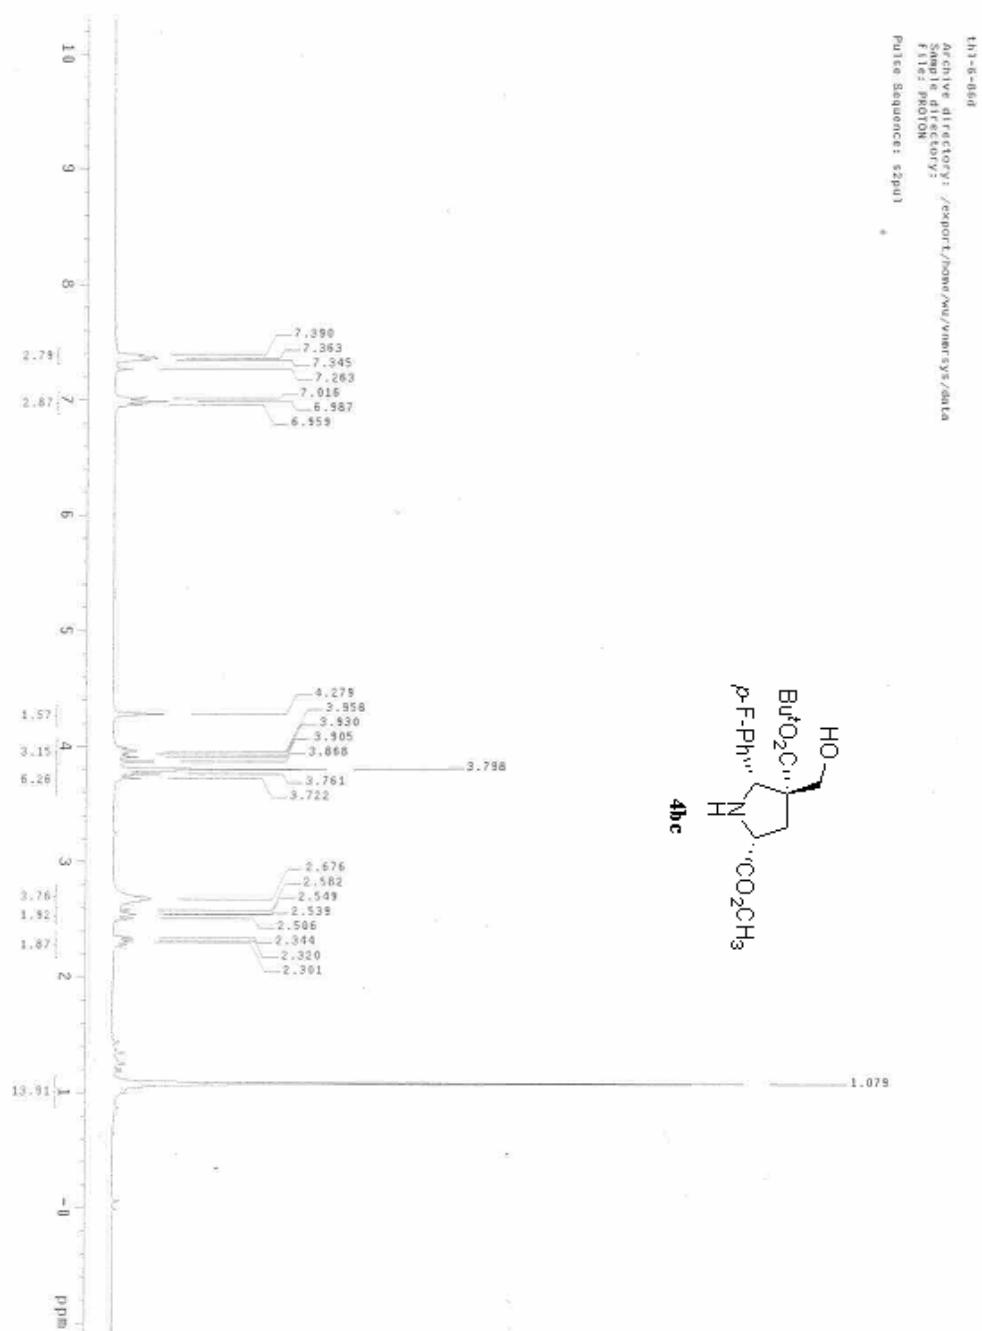

THL-6-801  
 Archive directory: /export/home/nw/rrm/sys/dbta  
 Sample directory:  
 File: C4H8N  
 Pulse Sequence: zgpg1  
 Solvent: CDCl3  
 Acquisition Temperature  
 Mercury-30000 "mercury3000"  
 Relax, delay 1.000 sec  
 Rotate 28.0 degree  
 Acq. time 0.000 sec  
 Width 17241.4 Hz  
 36 repetitions  
 OBSERVE D13, 75.0552578 MHz  
 DDPORF 10, 380.0021902 MHz  
 F2proc 10, 380.0021902 MHz  
 continuously on  
 WALTZ-16 modulated  
 DATA PROCESSING  
 FT 4.000000000000000  
 FT 4.000000000000000  
 Total time 6 hr, 50 min, 25 sec

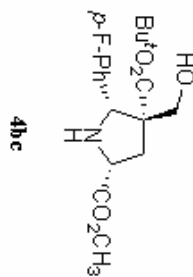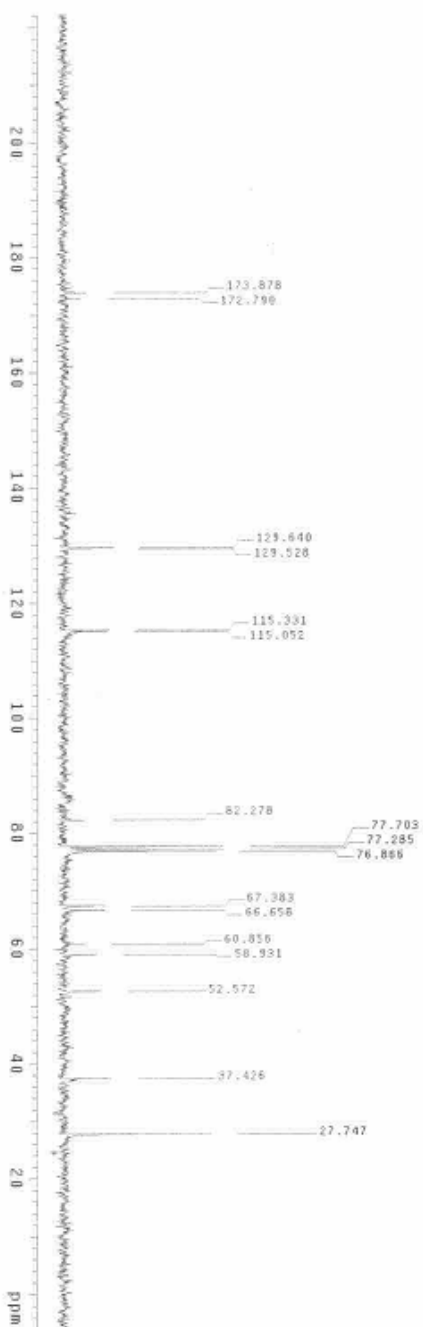

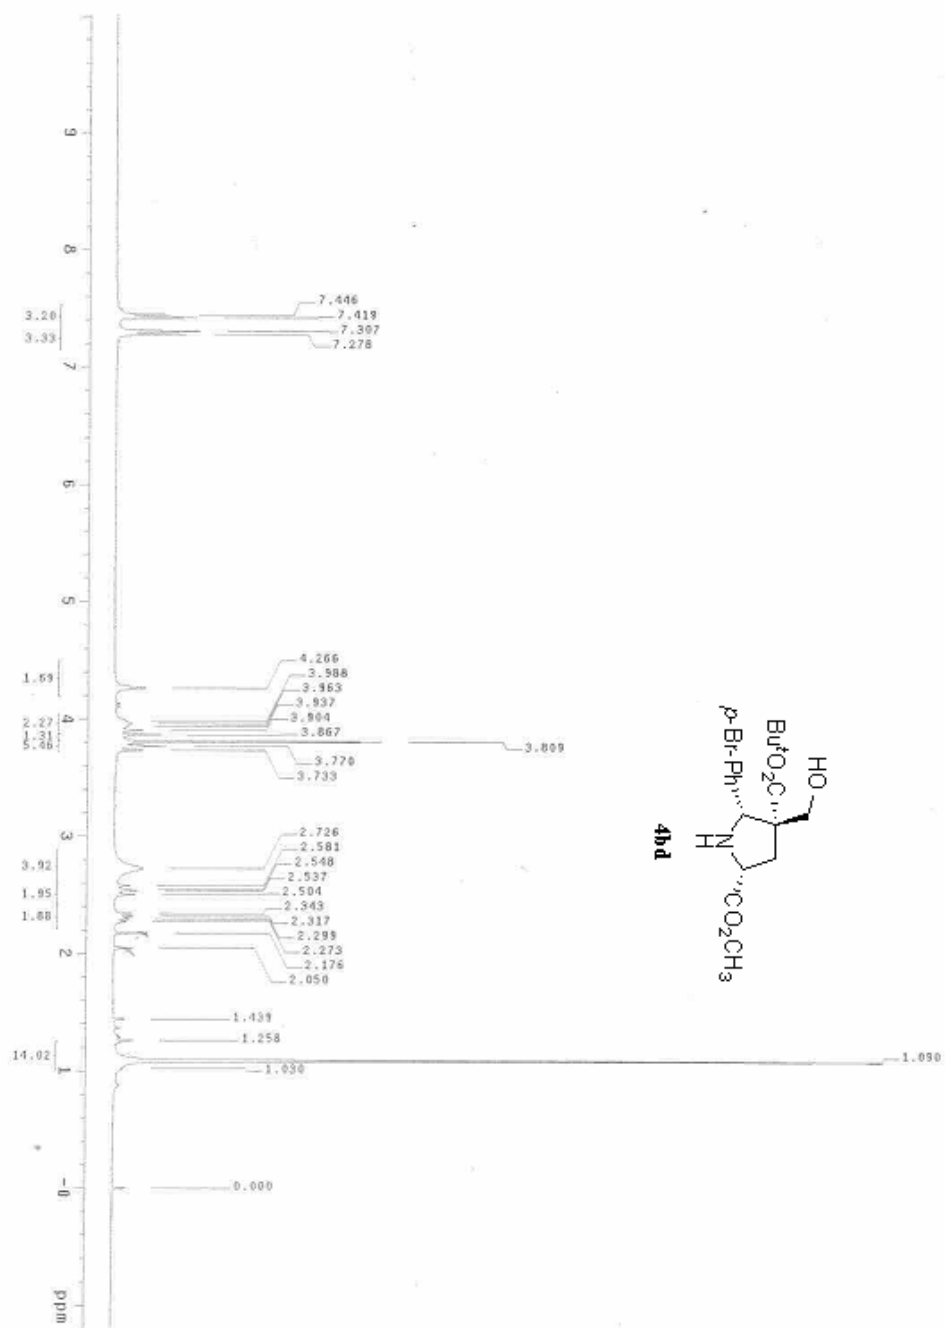

Archive directory: /export/home/MJ/vmr/sv5/0660  
 Sample directory:  
 File: CARBON  
 Pulse sequence: zgpg3  
 Solvent: CDCl3  
 Ambient temperature  
 Mercury-38005 "mercury3800"  
 Relax, delay: 1.000 sec  
 Pulse: 28.0 degrees  
 Width: 12.0 Hz  
 Width: 12.0 Hz  
 76 repetitions  
 OBSERVE: C13, 75.4512094 MHz  
 RECORD: H1, 300.0821962 MHz  
 CONTINUOUSLY ON  
 MOLTZ-16 modulated  
 QMVA PROCESSING  
 F1: 75.4512094 MHz  
 F2: 300.0821962 MHz  
 Total time: 1 hr, 34 min, 32 sec

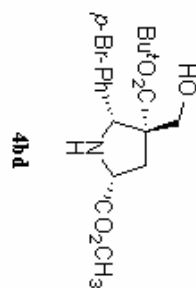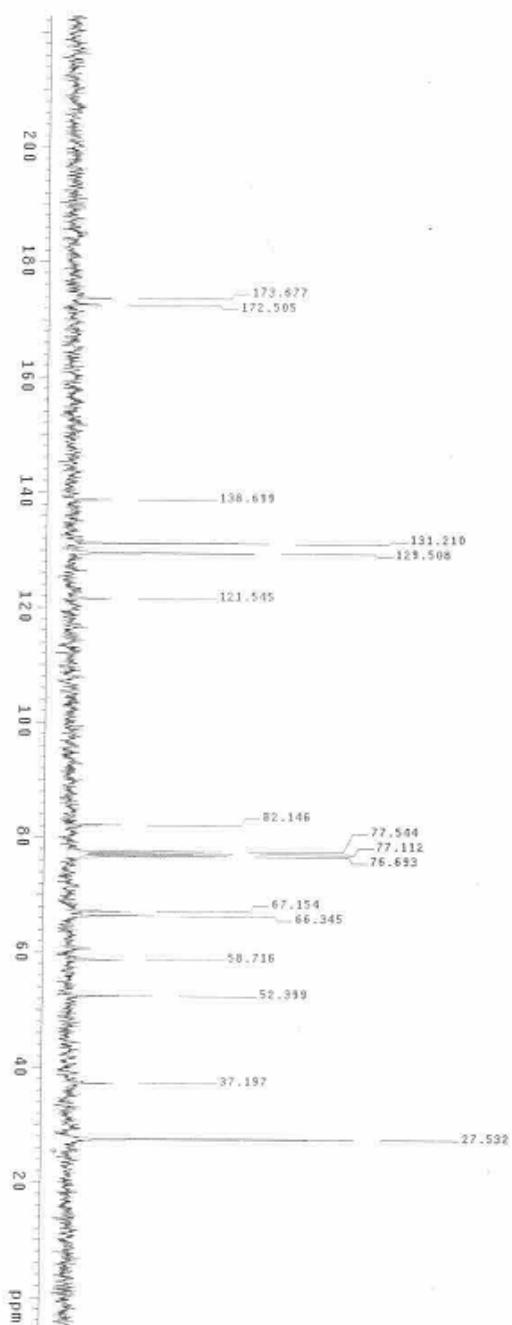

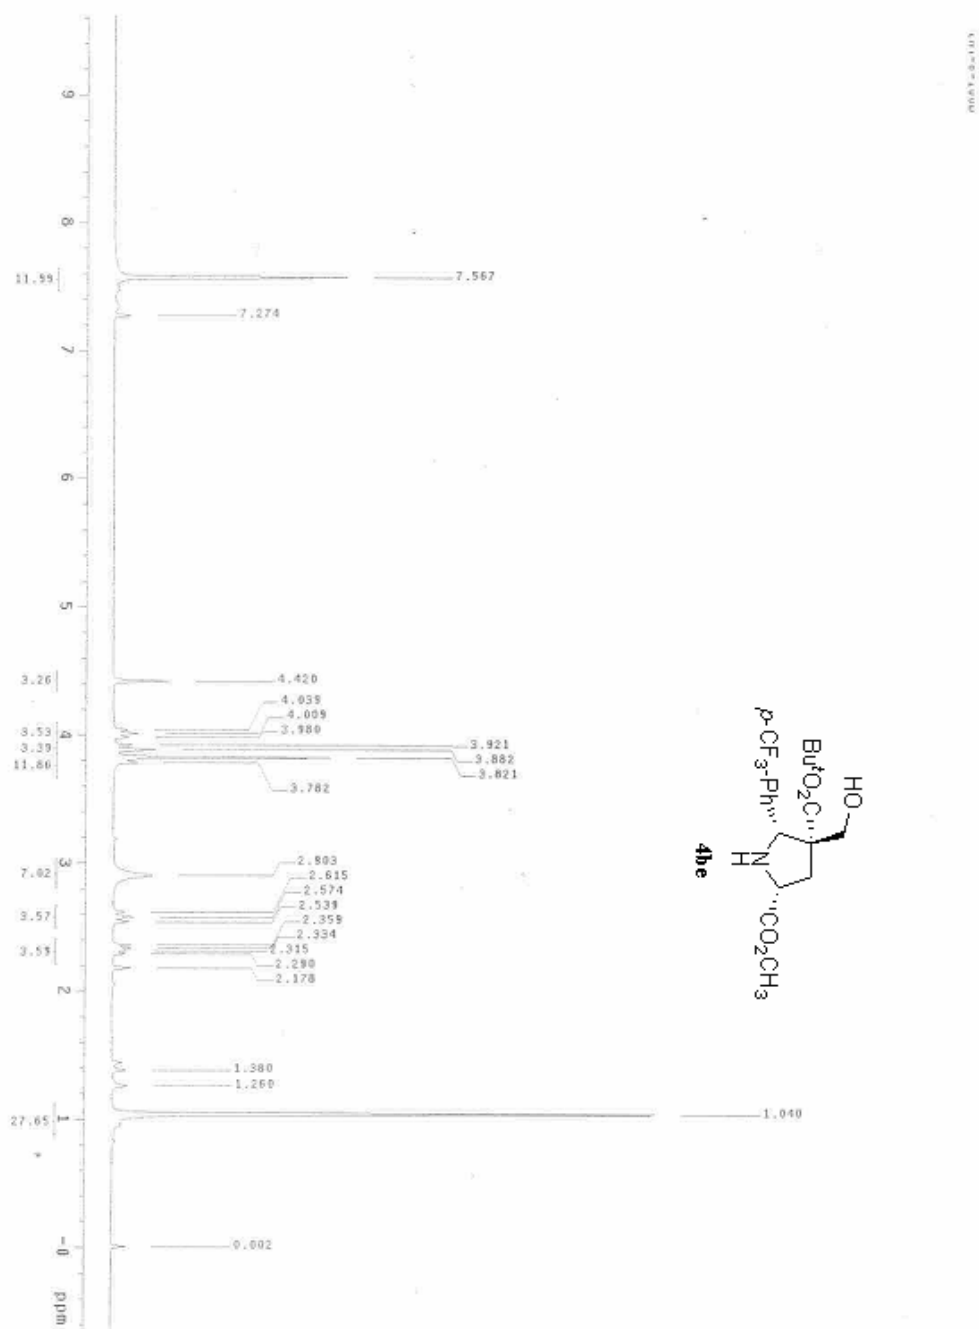

Archive directory: /export/home/ju/vmr/sys/data  
 Sample directory:  
 File: CARBON  
 Pulse Sequence: zgpg30  
 Solvent: CDCl3  
 Solvent temperature:  
 Mercury-300SD Mercury300P  
 Relax, delay 1.000 sec  
 Pulse 28.0 degrees  
 Width 12.000 Hz  
 Width time 0.300 sec  
 218 repetitions  
 OBSERVE CH3 75.4852054 MHz  
 OBSERVE CH1 300.0821982 MHz  
 P1 0.00000000  
 Continuously on  
 MALTZ-1b module used  
 QMVA PROCESSING  
 F1 time processing 4.0 Hz  
 F2 time processing 4.0 Hz  
 Total time 1 hr, 34 min, 32 sec

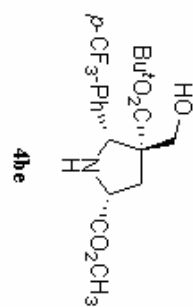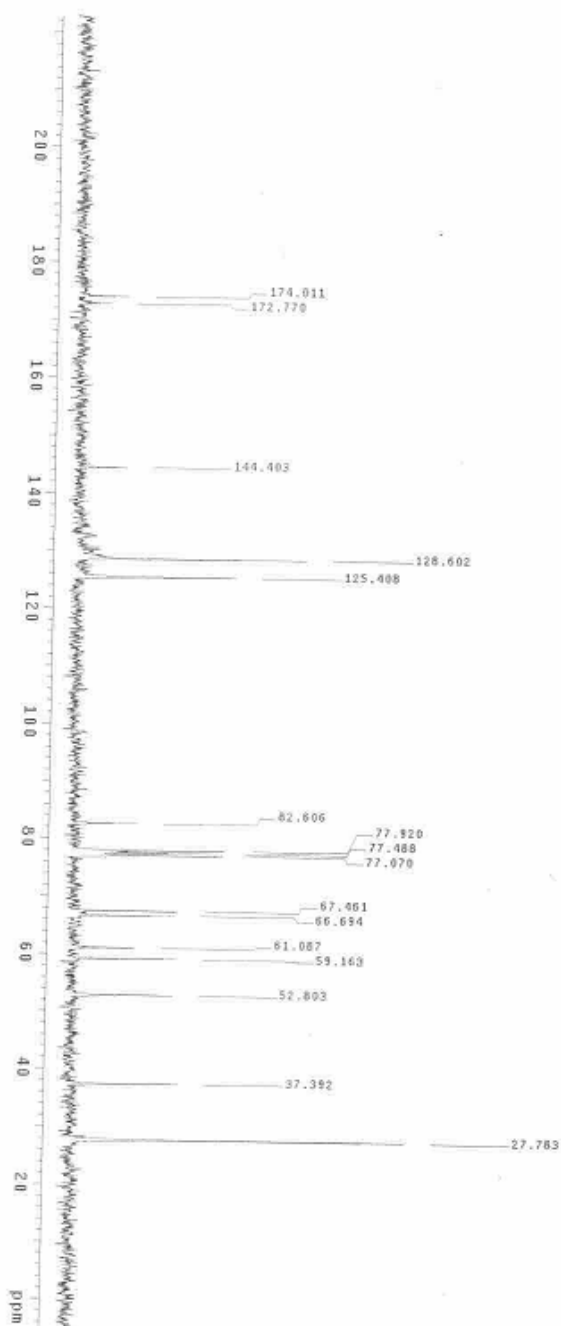

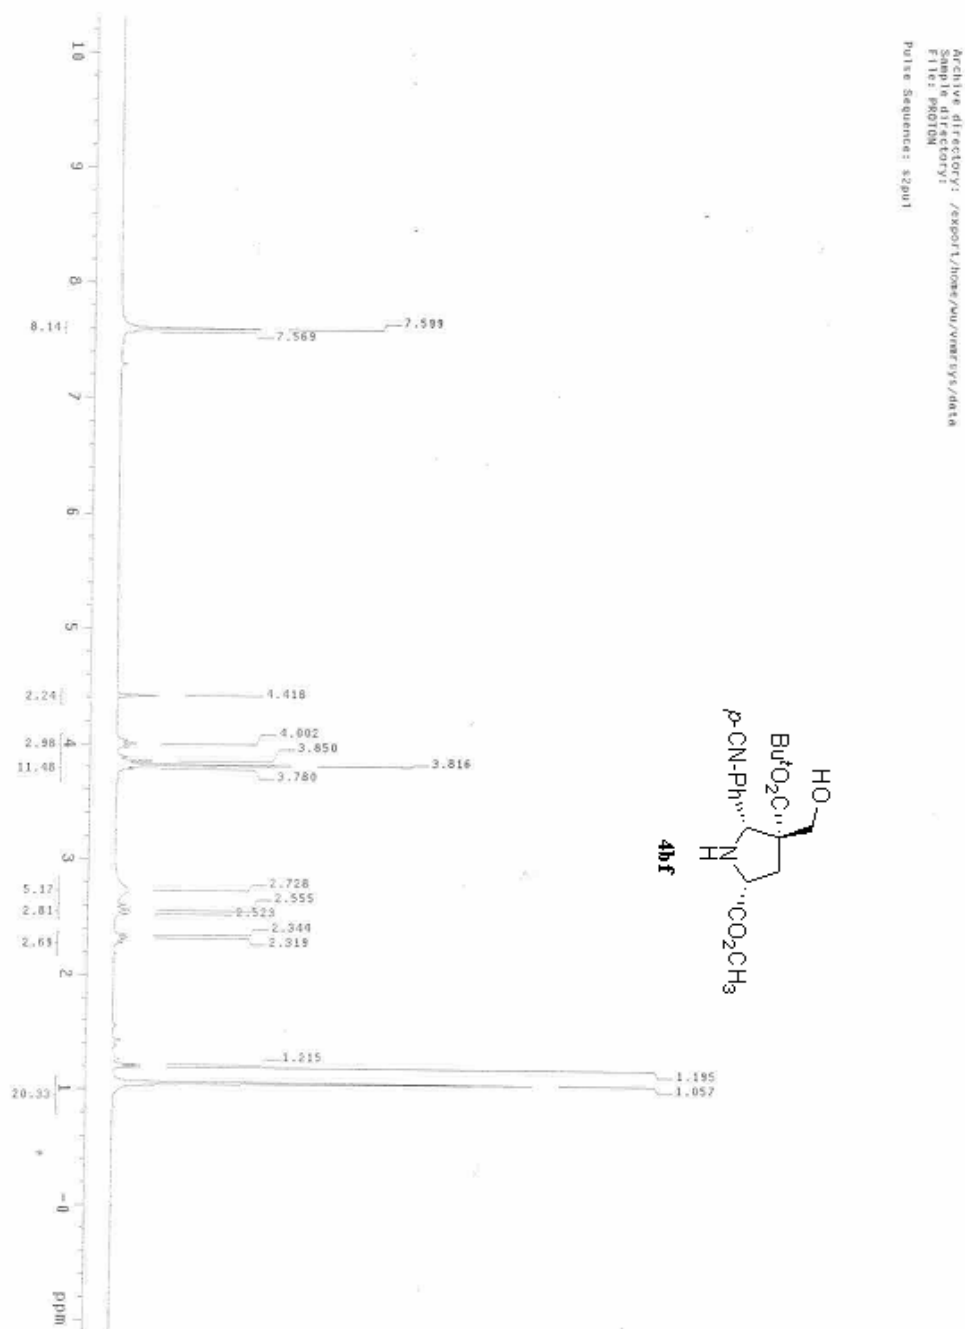



Archive directory: /hsport/home/mu/vnmr/sys/delta  
Sample directory:  
File: C08D08  
Pulse Sequence: zgpg30  
Solvent: CDCl3  
Acquire Temperature  
Mercury-300MHz Mercury300M  
Rf In: 101.621471, 1.000 sec  
Pulse: 28.0 degrees  
Pulse Length: 12.000 sec  
Width: 17241.4 Hz  
160 Repetitions  
OBSERVE: C13, 75.4552576 MHz  
DECOUPLE: H1, 500.0821362 MHz  
SOLVENT: CDCl3  
Continuously on  
MAG: 12.16, modulated  
DATA PROCESSING  
F1: 75.4552576 MHz  
F2: 500.0821362 MHz  
Total time: 8 hr., 50 min., 25 sec

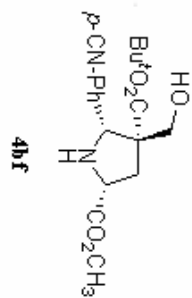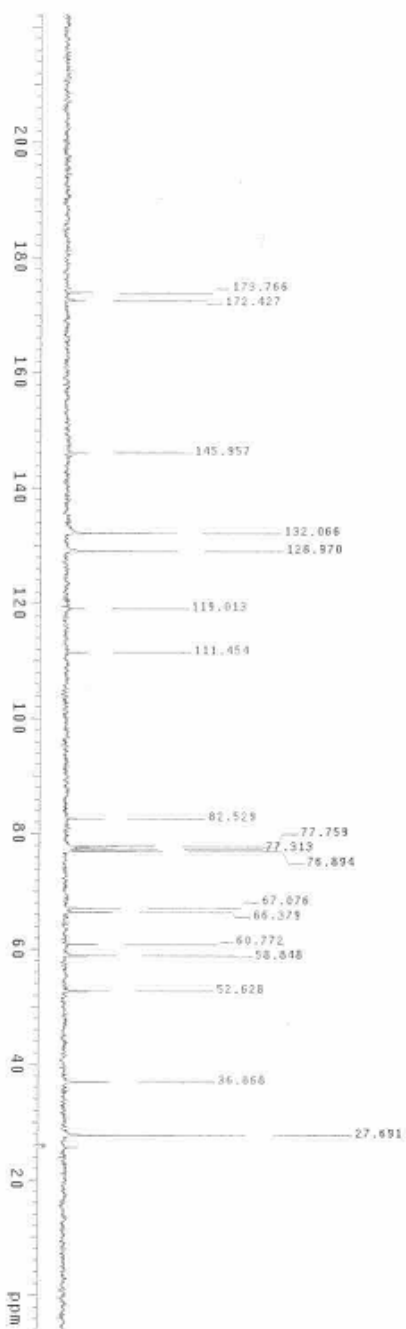

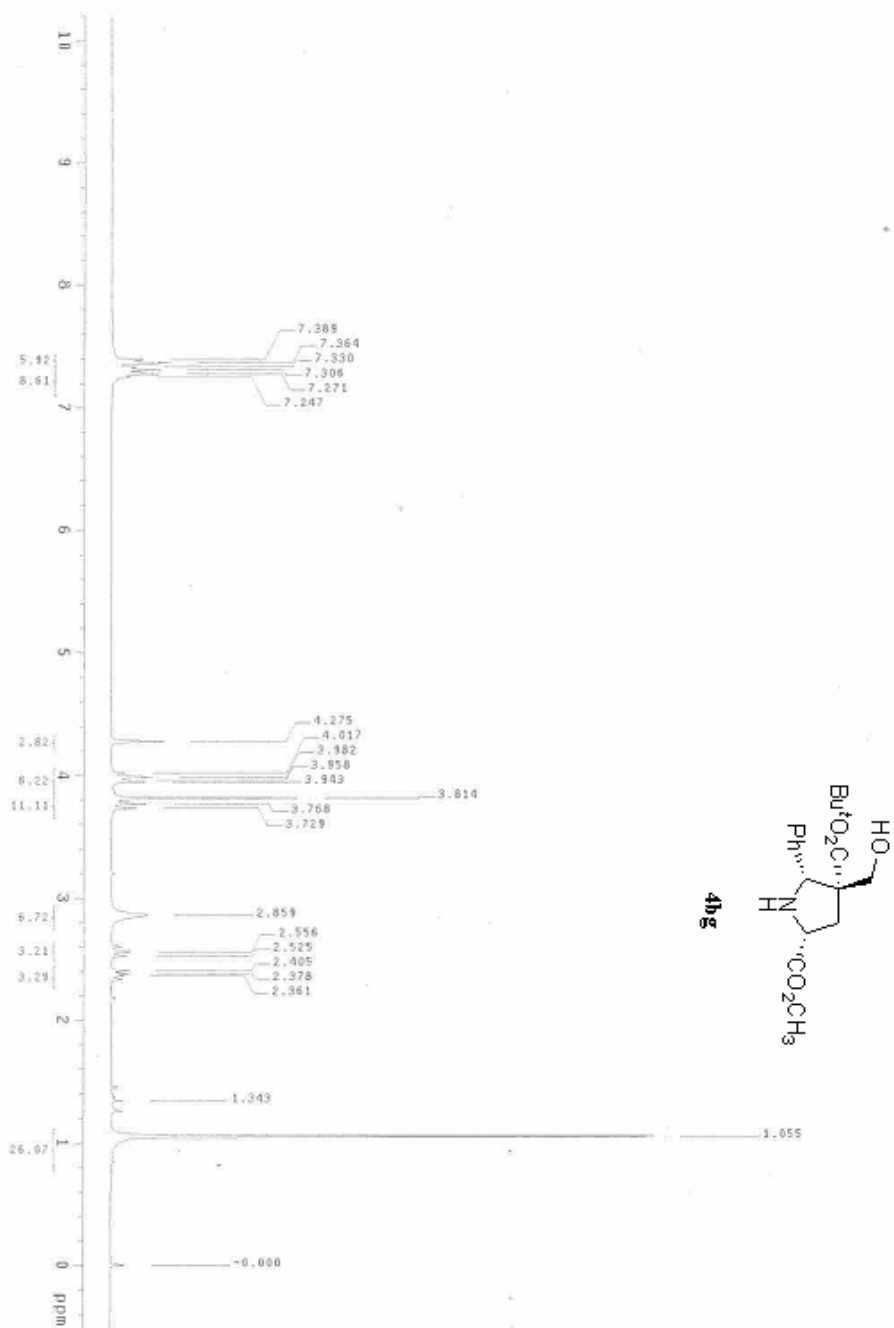

C131H1-6-100a  
Archive directory: /report/home/nj/vmr/xyz/data  
Sample directory:  
File: C131H1  
Pulse sequence: zgpg30  
Solvent: CDCl3  
Ambient temperature:  
Mercury-3000B "mercury3000"  
Relax: delay 1.800 sec  
Pulse: zgpg30  
Acq. time 0.501 sec  
Width 17241.4 Hz  
108 repetitions  
Q resolution 0.4553054 MHz  
Decouple CH2 300.0021862 MHz  
Power 40 dB  
continuously on  
MULTI-16 modulated  
Pulse program: zgpg30  
Pulse broadening 4.0 Hz  
FT size 32768  
Total time 3 hr, 34 min, 32 sec

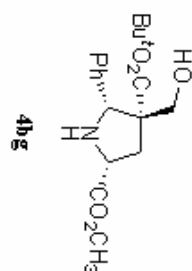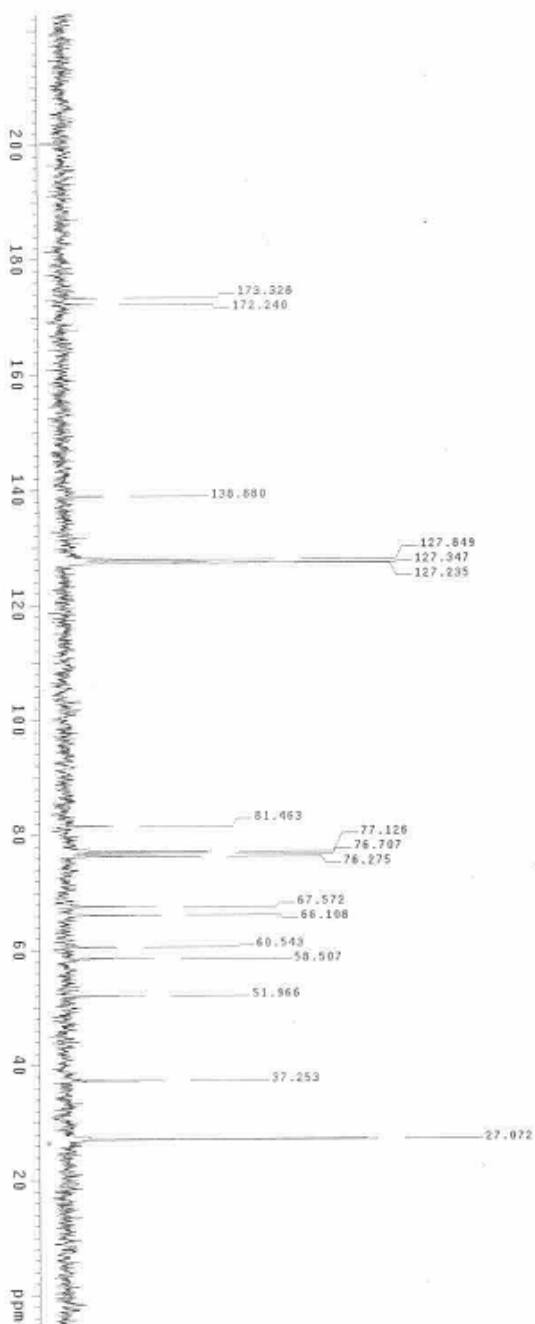

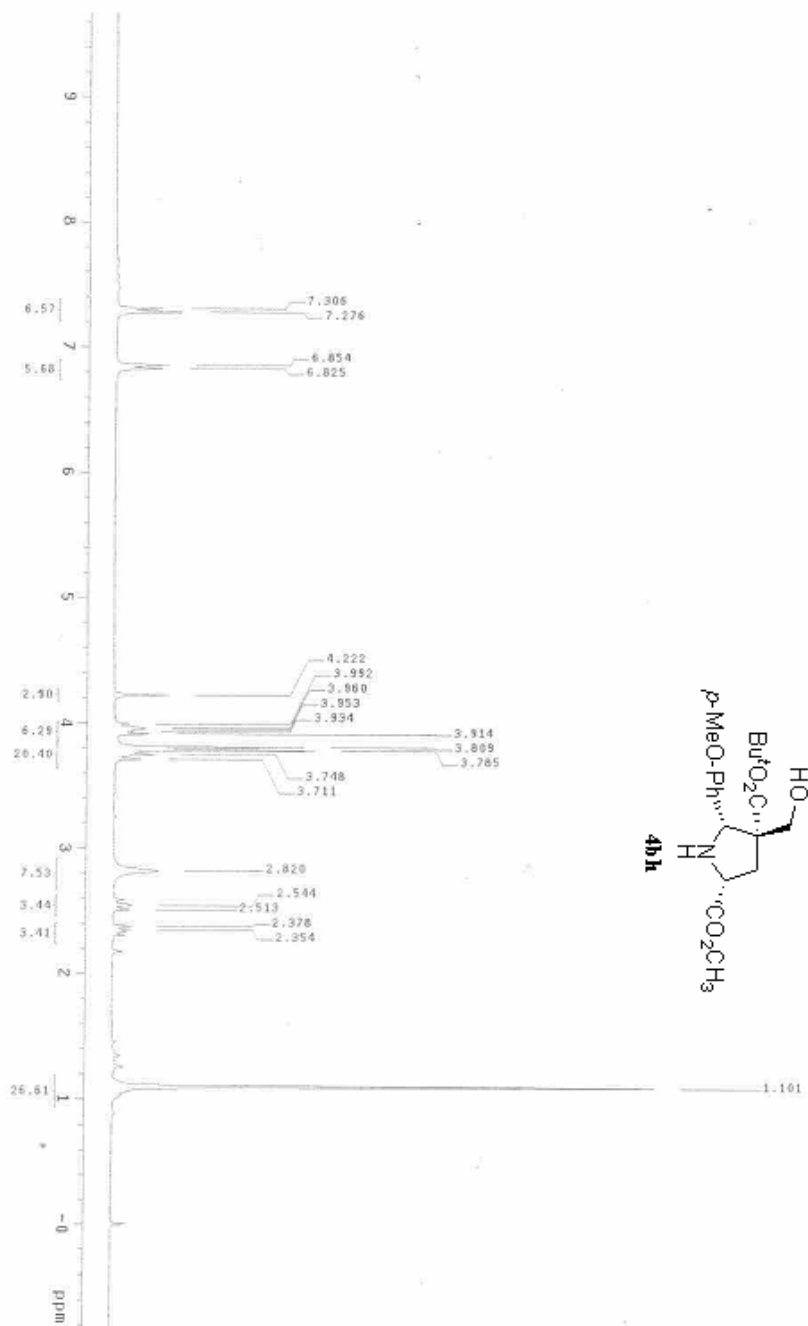

C13H11-6-100C  
 Archive directory: /export/home/ncu/yymr3ys/data  
 Sample directory:  
 File: CMB008  
 Pulse Sequence: zgpg30  
 Solvent: CDCl3  
 Ambient temperature  
 Mercury-300MS "Mercury300"  
 Relax: 861ng 1.000 sec  
 Acq. time: 0.501 sec  
 Width: 17241.4 Hz  
 128 repetitions  
 OBSERVE: C13, 75.452464 MHz  
 PULPROG: zgpg30, 300.6051962 MHz  
 Power: 40 db  
 continuously on  
 WALTZ-16 modulated  
 OMTA PRODCSS: NO  
 FT: 6120 32768  
 Total time: 1 hr, 34 min, 32 sec

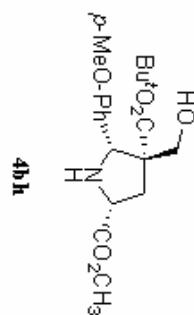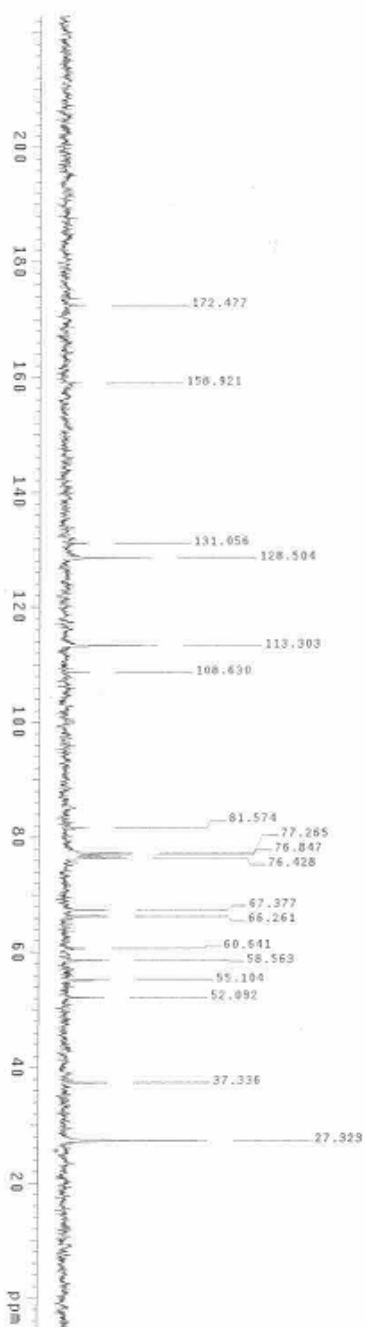

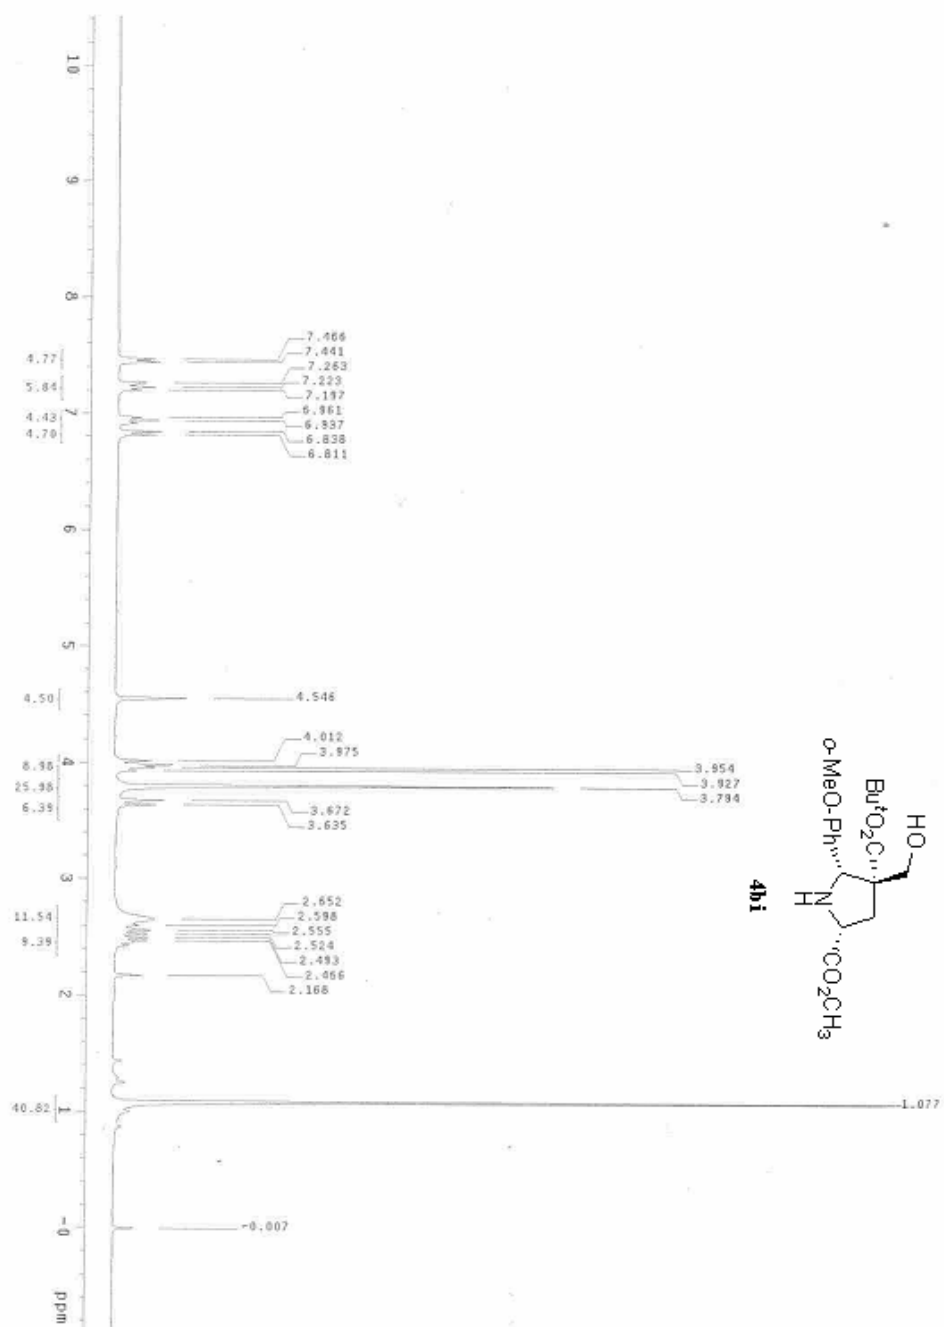

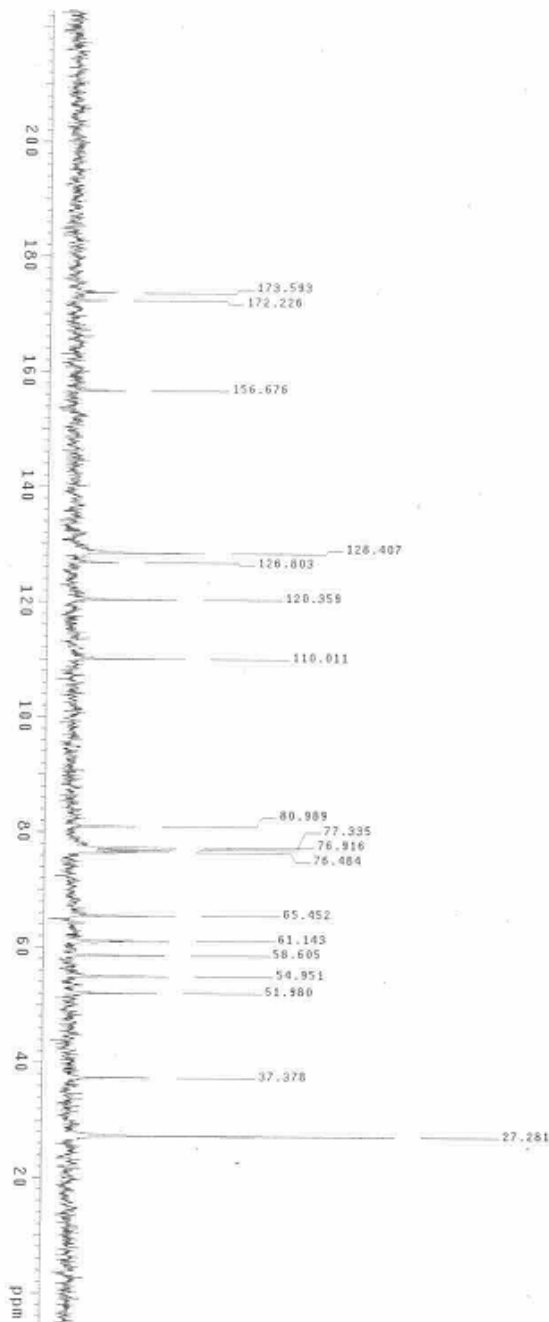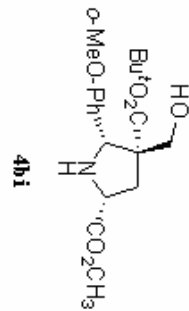

4b1h1-6-100c  
Acquire directory: /rsprot/home/nu/yuan/4b1/4b1h1-6-100c  
Sample directory:  
F1: 4b1\_006000  
Pulse Sequence: zgpg30  
Solvent: CDCl3  
Ambient temperature  
Mercury-3000B Mercury/3000  
Roller delay 1.000 sec  
Pulse 20.0 degrees  
Acq. time 0.501 sec  
Width 12241.9 Hz  
Observed F1 75.4552054 MHz  
Decouple H1 500.1361862 MHz  
Power 40 dB  
continously on  
AMU PROCESED  
Line broadening 4.0 Hz  
FT size 32768  
Total time 1 hr, 34 min, 32 sec

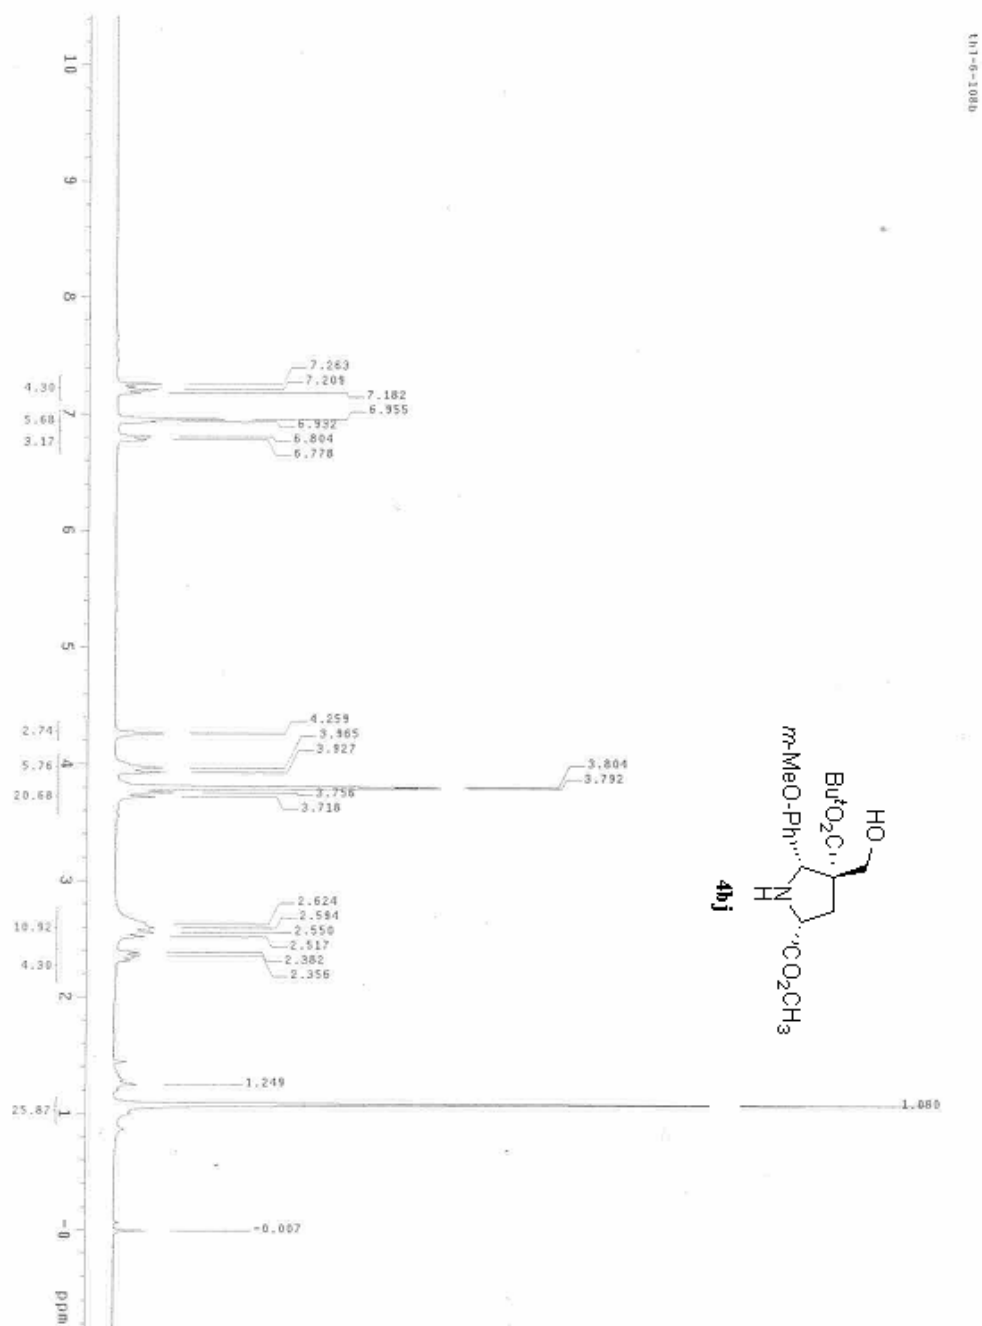



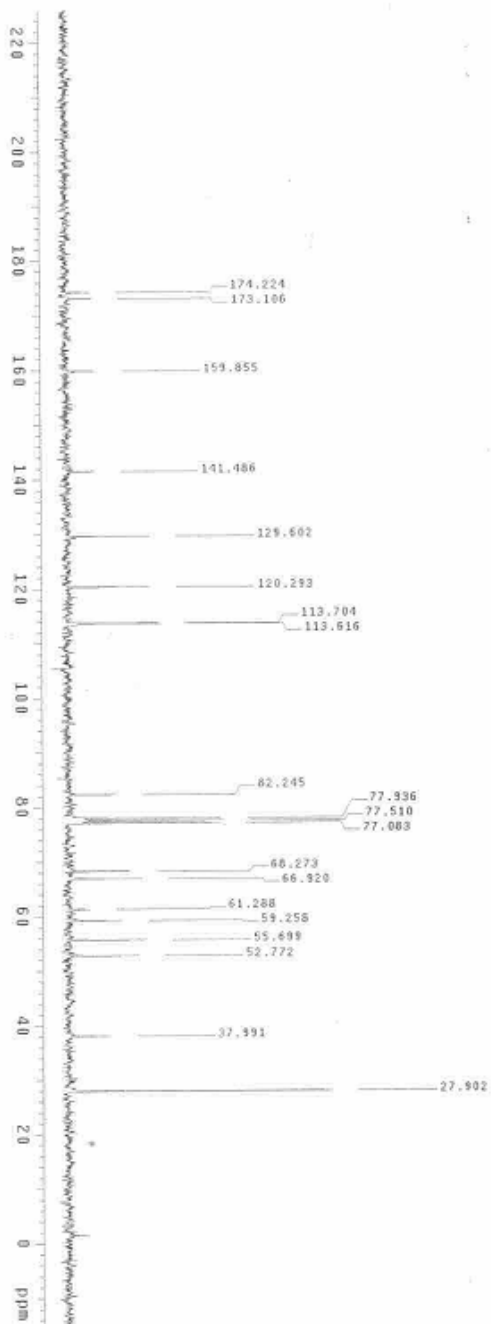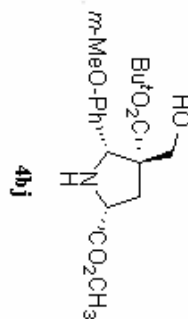

013E11-6-108B  
Solvent: CDCl<sub>3</sub>  
Ambient temperature  
Mercury-300BB, "mercury300"  
Relax. delay 1.000 sec  
Pulse 28.0 degree  
Width 18.618 Hz  
Mod 18.618 Hz  
3096 repetitions  
OBSERVE C13, 75.452376 MHz  
DECOUPLE H1, 300.0821982 MHz  
continuous Ly on  
VWL T2-T16 modulated  
DATA PROCESSING  
Line broadening 4.0 Hz  
SI 32768  
F1 252.130444  
Total time 1 hr, 27 min, 38 sec.

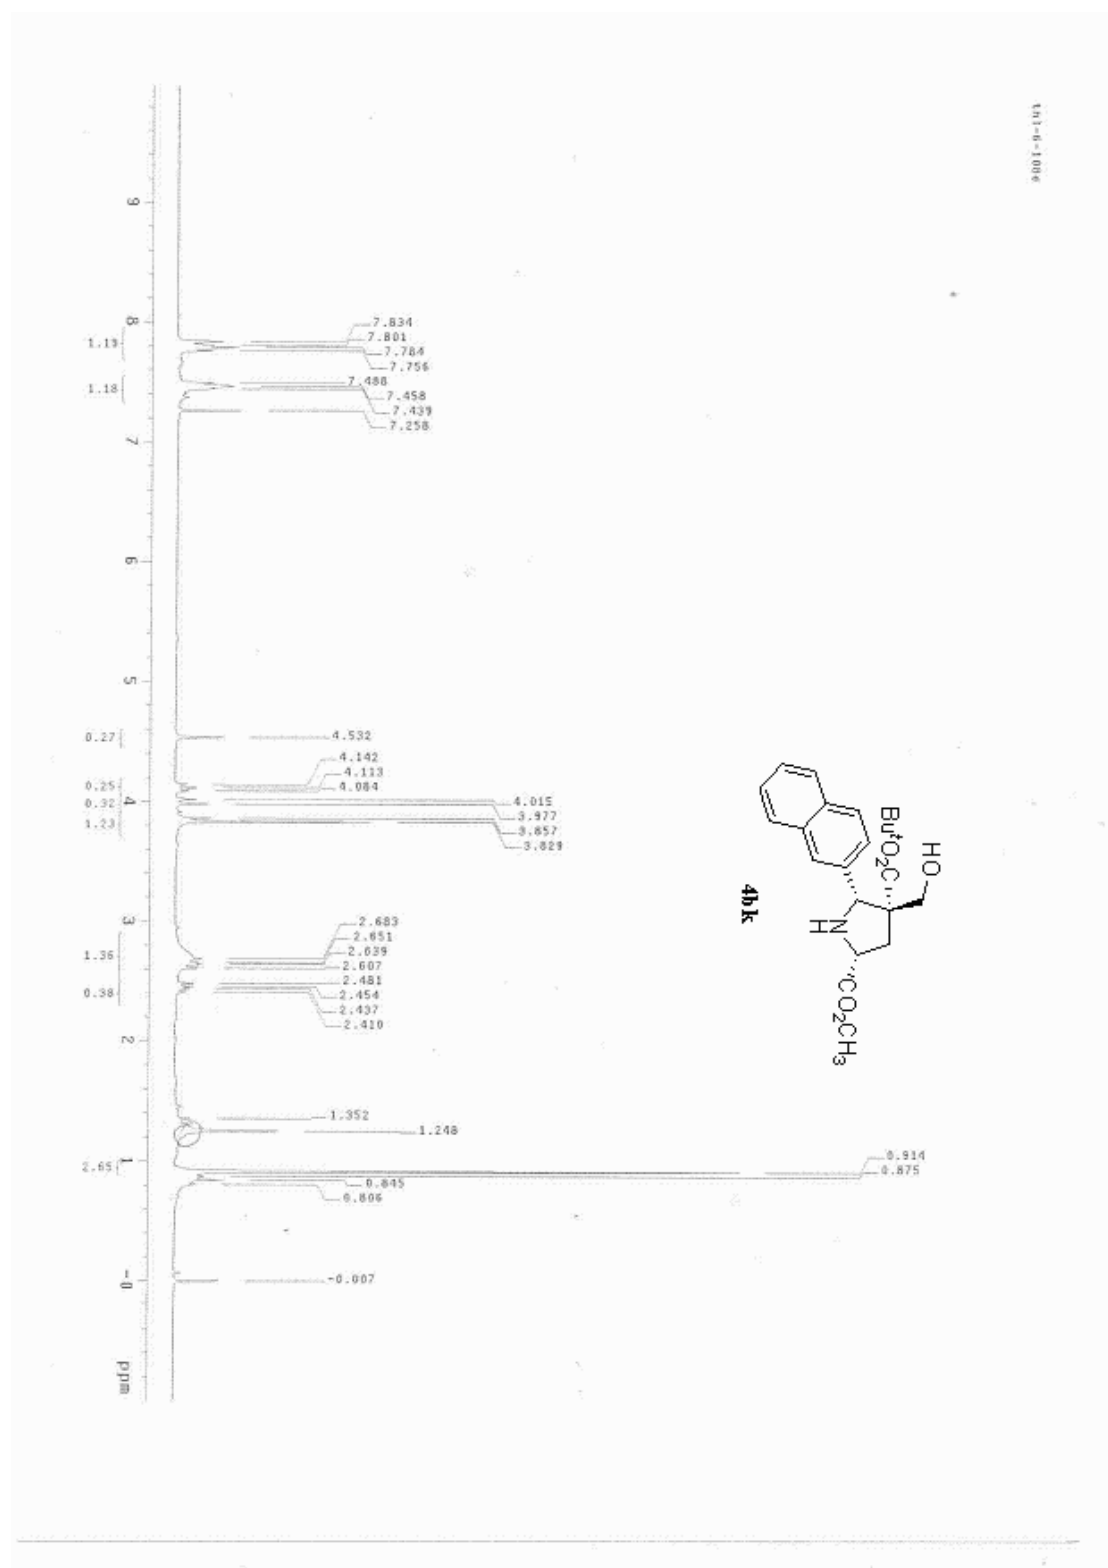



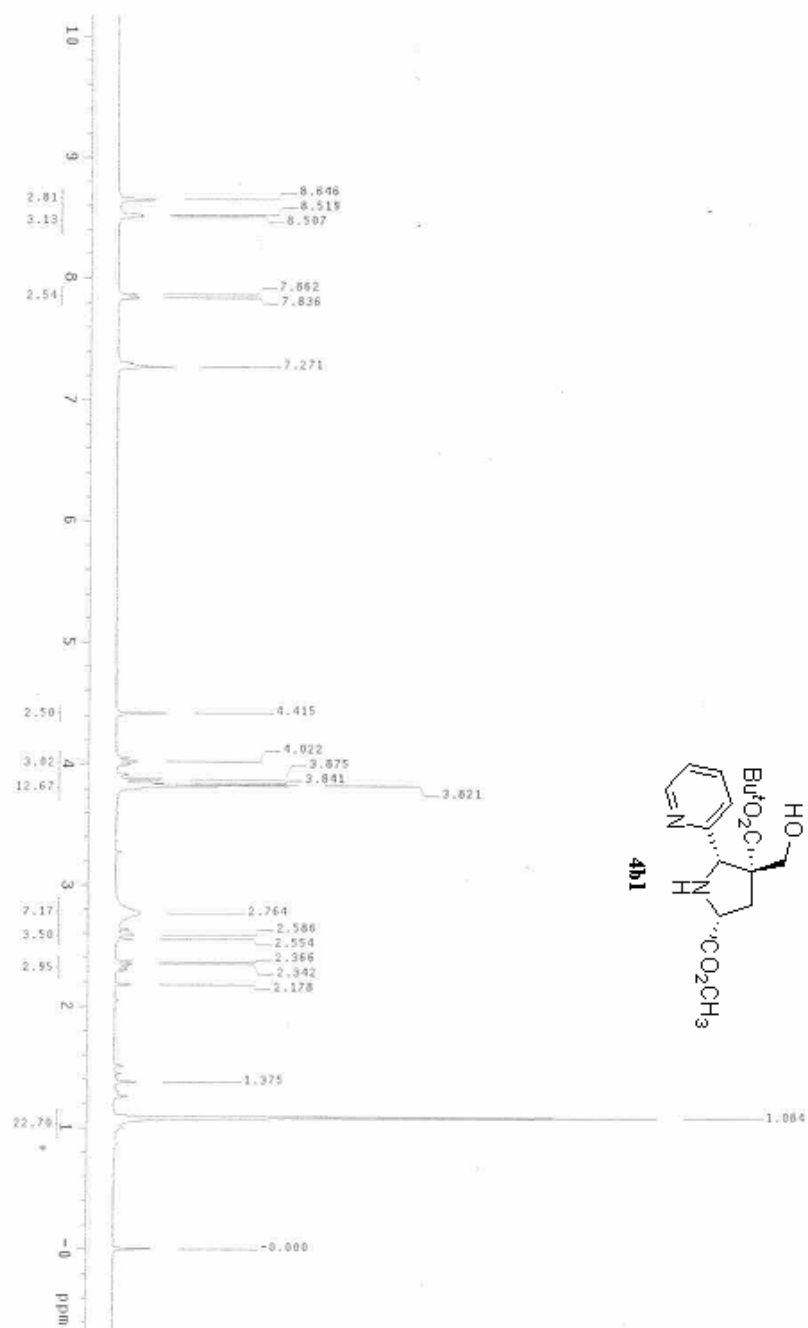

Archive directory: /export/home/nu/nu001359/0004  
Sample directory:  
File: CARBON  
Pulse Sequence: zgpg30  
Solvent: CDCl3  
Pulsed program: zgpg30  
Mercury-300BB "mercury300p"  
Relax. delay 1.000 sec  
Pulse 28.0 degrees  
Acq. time 0.501 sec  
Nuc1: 13C  
Nuc2: 13C  
F2: repetitions 102  
OBSERVE C13, 75.4532054 MHz  
DECOUPLE H1, 390.0021802 MHz  
Cont. program: zgpg30  
WALTZ-16 modulated  
DATA PROCESSING  
F1: line broadening 9.0 MHz  
F2: 128.02706  
Total time 1 hr, 34 min, 32 sec

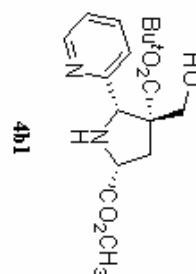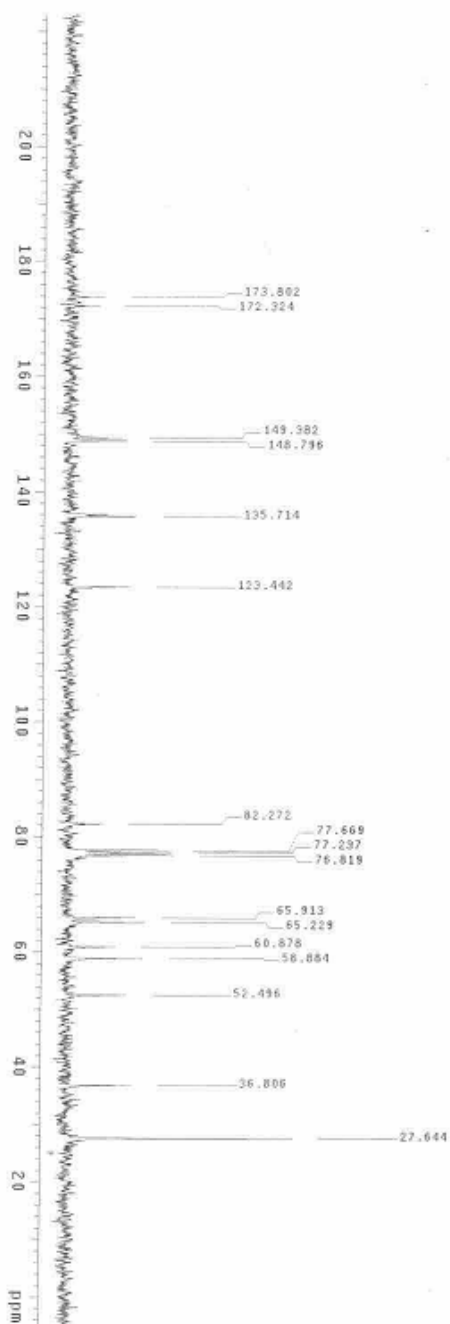

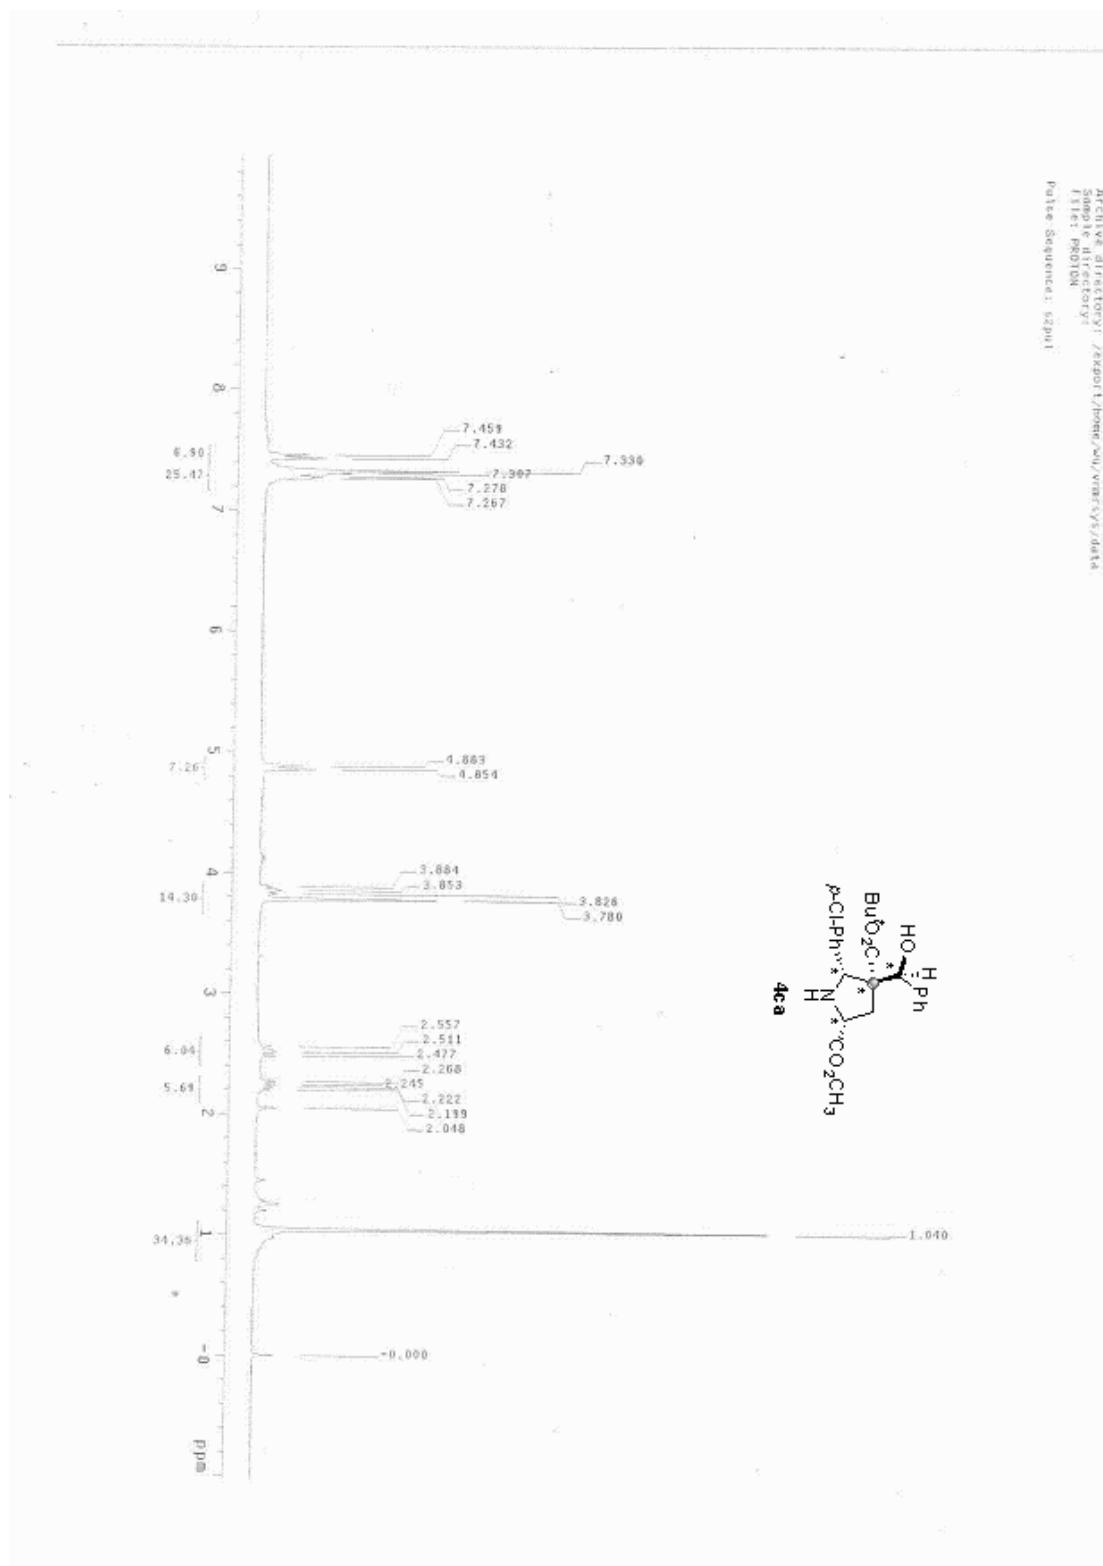

Archive directory: /report/home/ku/vme/xyz/data  
 Sample directory:  
 File: C40308  
 Pulse Sequence: zgpg30  
 Solvent: CDCl3  
 Ambient temperature  
 Mercury-300RB "mercury300"  
 Relax delay 1.000 sec  
 Acq. time 0.000000 sec  
 Width 18181.8 Hz  
 OBSERVE C13, 75.053278 MHz  
 PULSEPROG zgpg30, 300.0021902 MHz  
 Power 40 dB  
 continuously on  
 MALTZ-16 modulated  
 DATA PROCESSING  
 FT 1328 32768  
 Total time 9 hr, 10 min, 41 sec

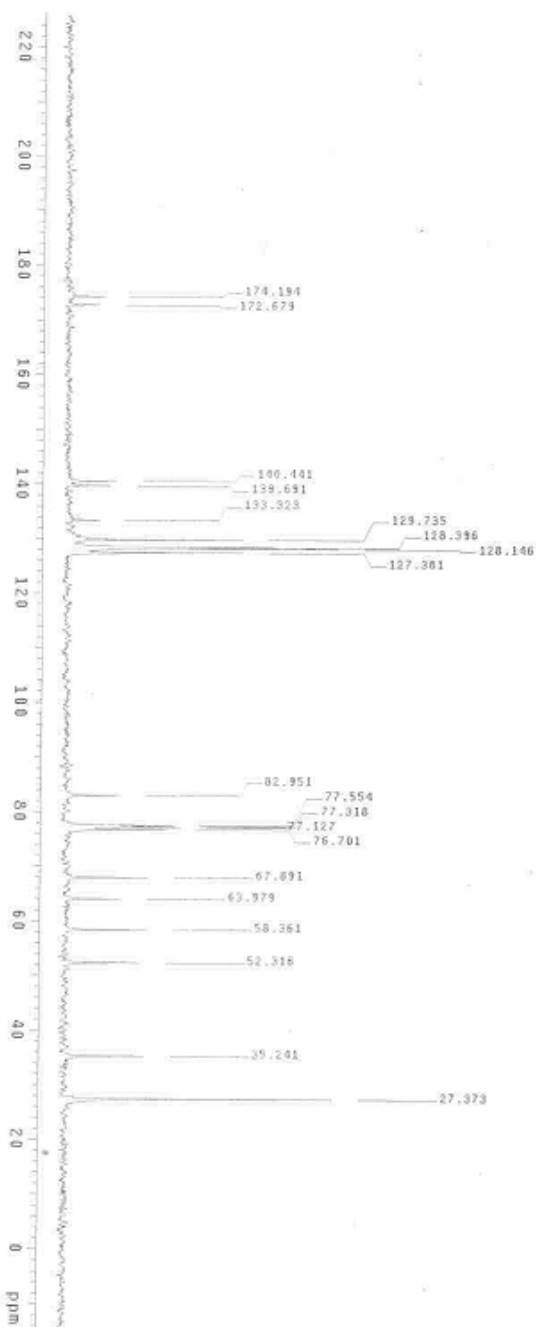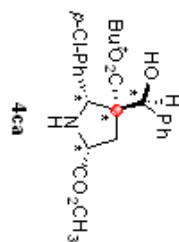

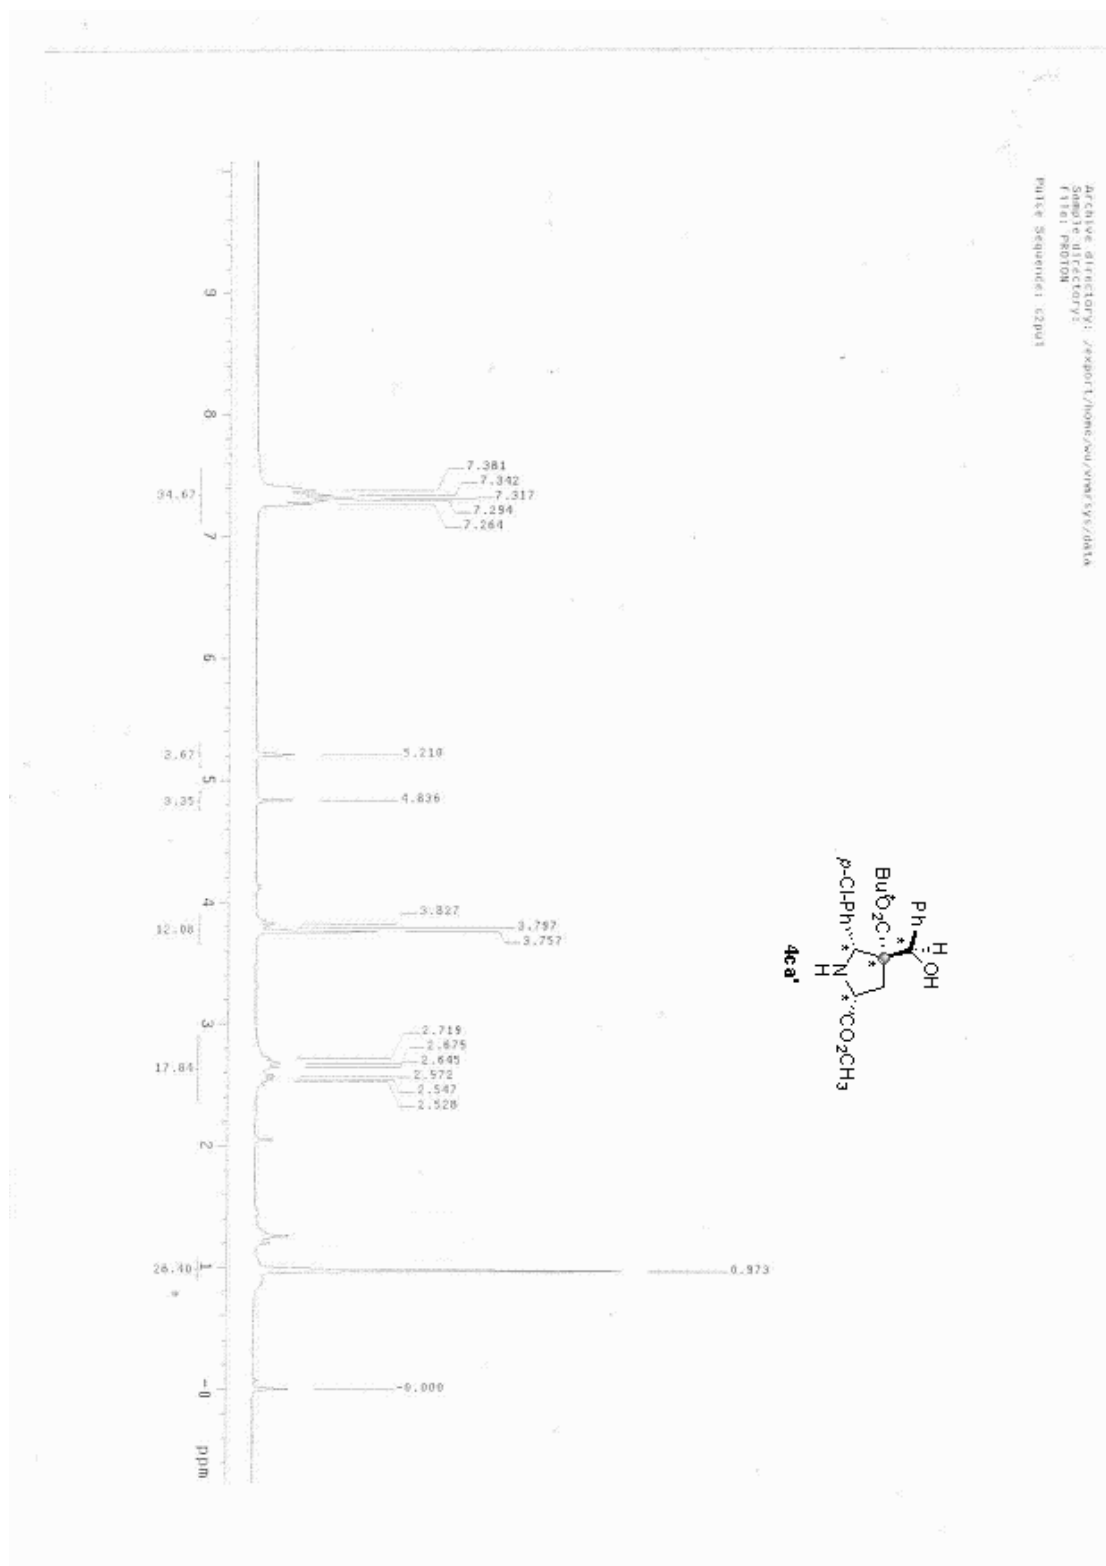



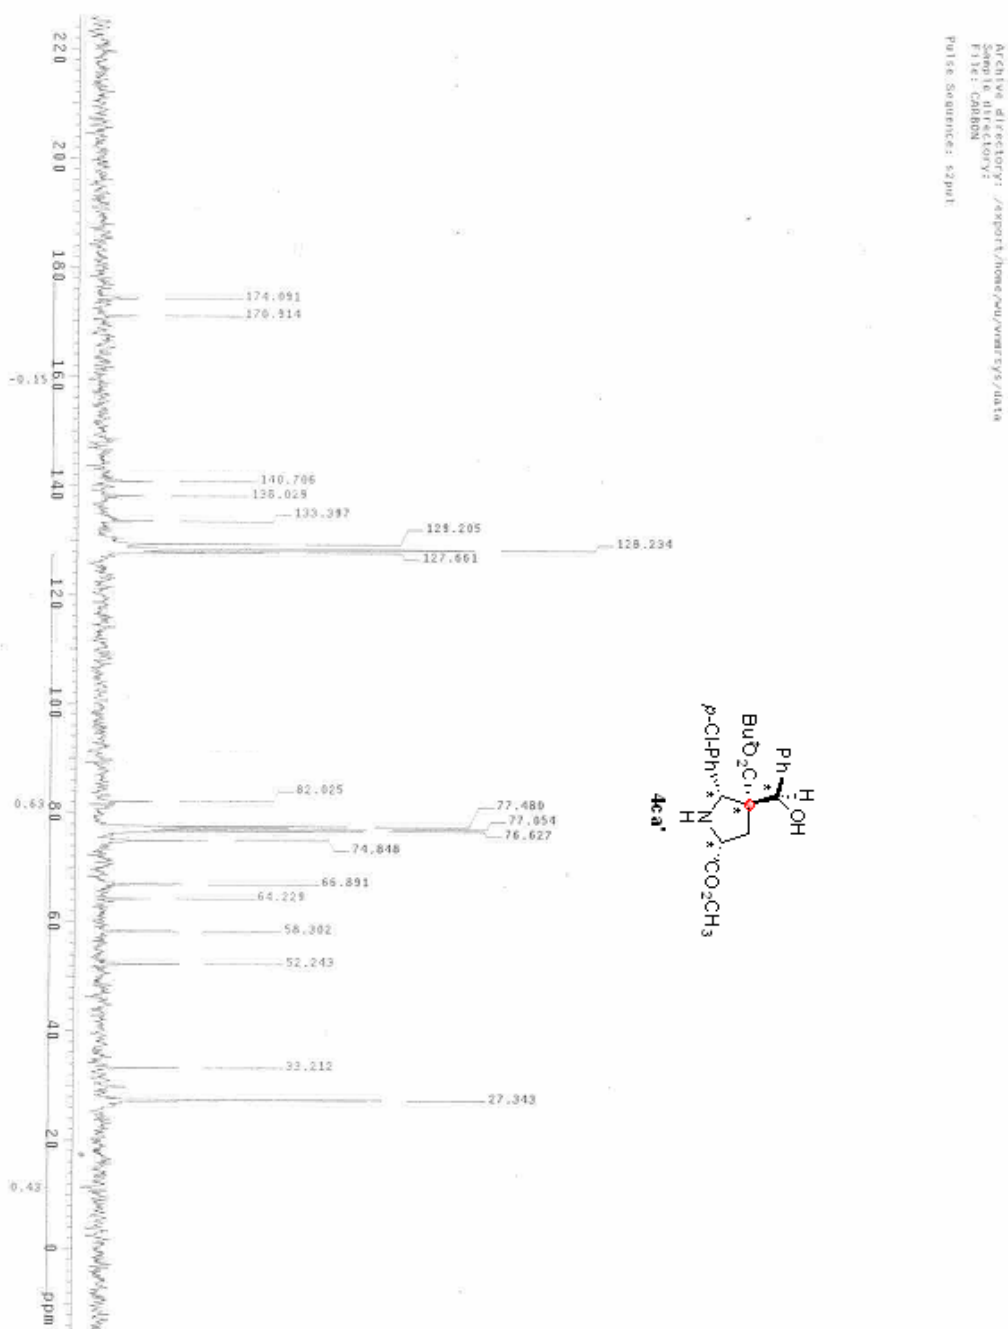

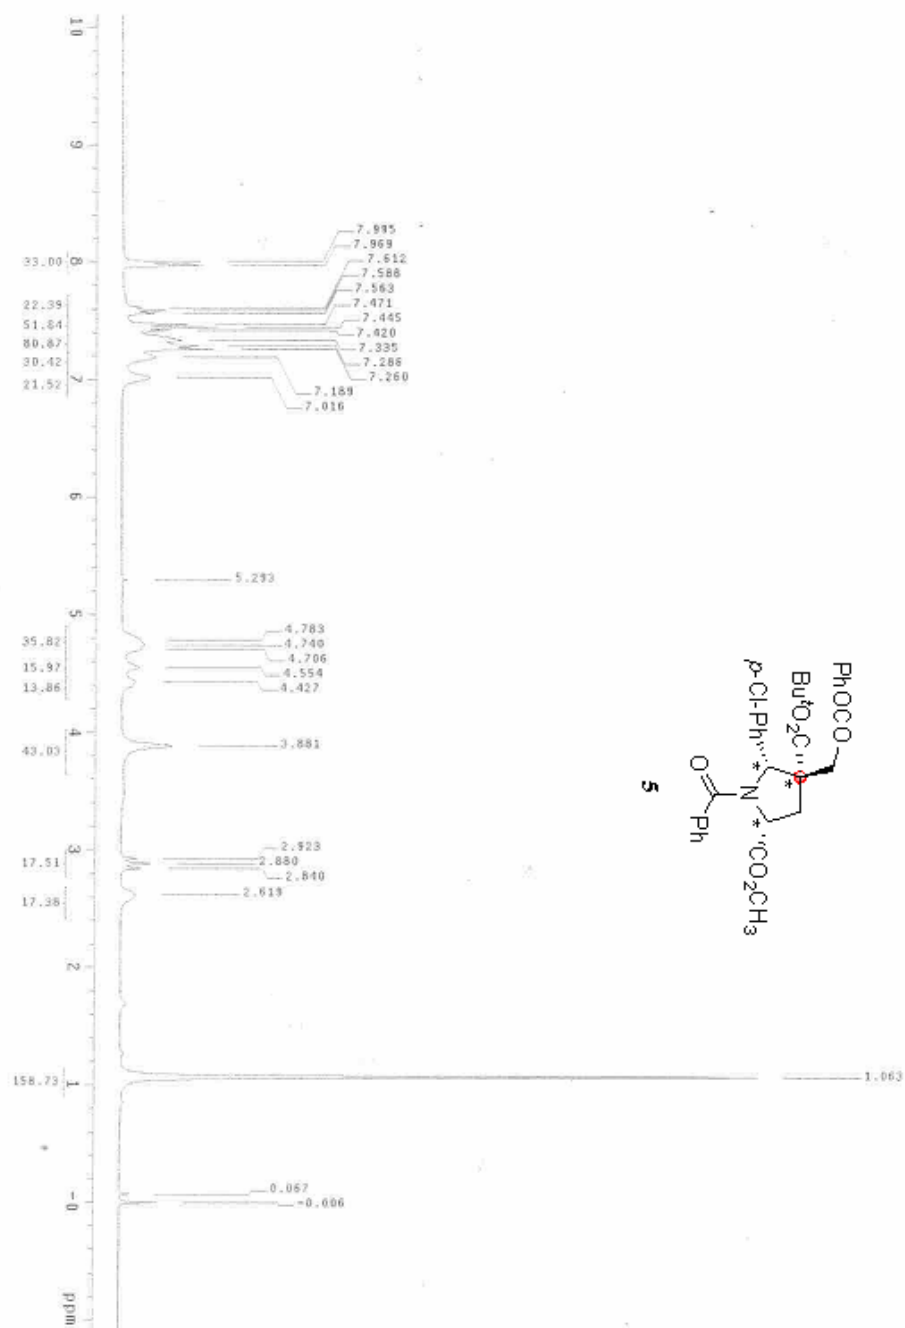

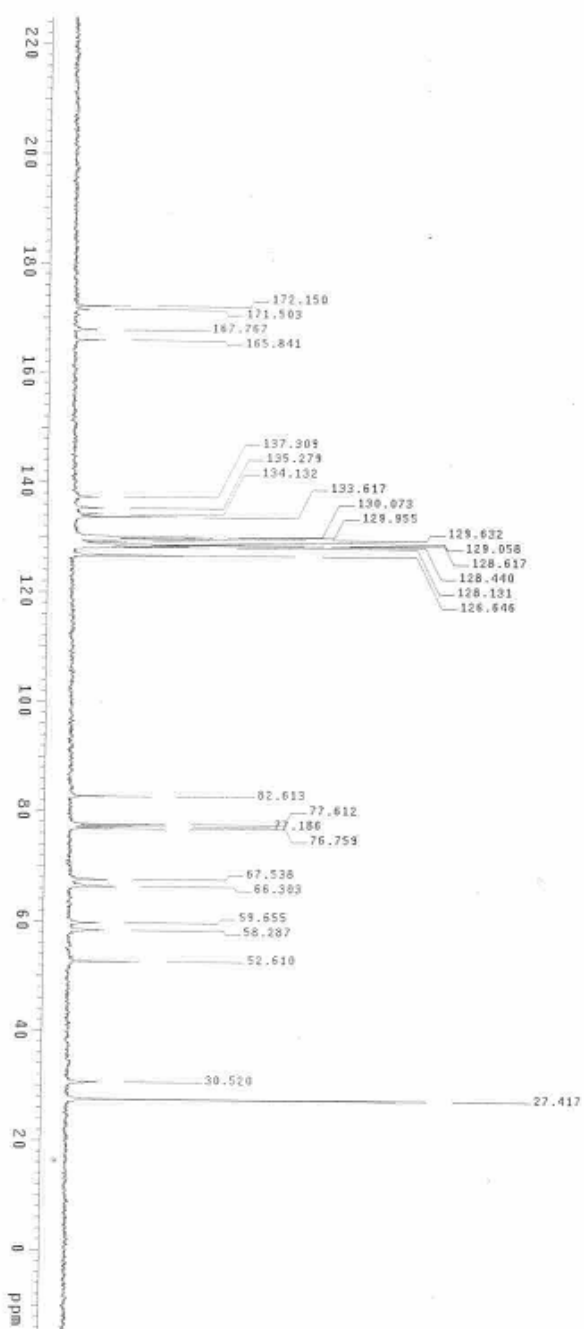

Solvent: CDCl3  
Ambient temperature  
Mercury-500BB "Mercury380"  
Relax. delay 1.000 sec  
Acq. time 0.500000 sec  
Acq. date 05/08/06  
Width 10181.8 Hz  
228 repetitions  
Oscillate C13: 75.452526 MHz  
Oscillate H1: 300.0821562 MHz  
Power to dB  
continuously on  
MULTI-16 modulated  
D1A PROBLESSING  
D1A PROBLESSING  
FT size 32760  
TOTAL time 57 min, 53 sec

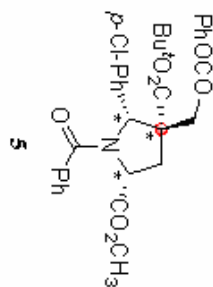



Data File D:\LC\THL\DATE\THL-6-58\THL-6-58 2010-11-06 12-28-44\008-0101.D  
 Sample Name: THL-6-48

```

=====
Acq. Operator   : TIC                               Seq. Line :    1
Acq. Instrument : Instrument 1                       Location  : Vial 8
Injection Date  : 11/6/2010 12:30:05 PM             Inj       :    1
                                                    Inj Volume: 5 µl
Acq. Method     : D:\LC\THL\DATE\THL-6-58\THL-6-58 2010-11-06 12-28-44\ASH-90-10-05ML-210NM-
                    50MIN.M
Last changed    : 11/6/2010 12:26:41 PM by THL
Analysis Method : D:\LC\THL\DATE\THL-6-58\THL-6-58 2010-11-06 12-28-44\008-0101.D\DA.M (ASH-
                    90-10-05ML-210NM-50MIN.M)
Last changed    : 2/20/2011 2:28:42 PM by LTL
                    (modified after loading)
    
```

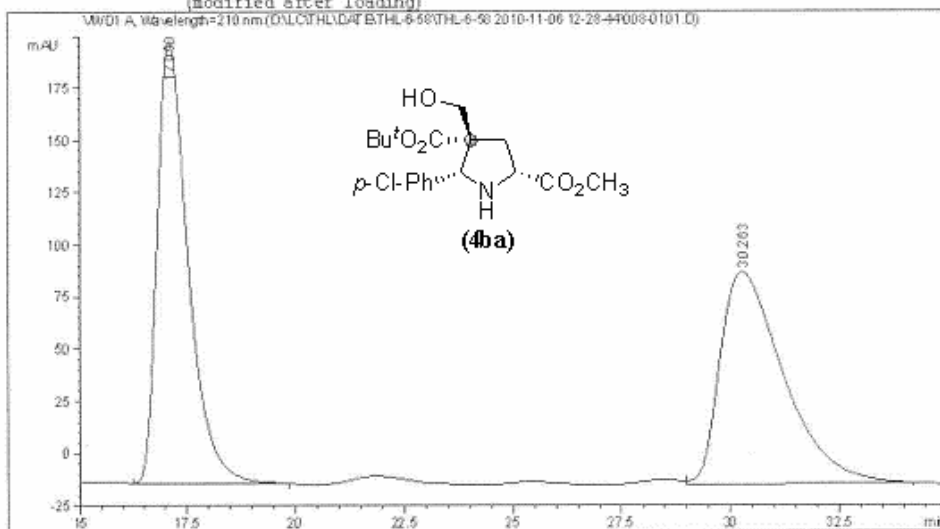

Area Percent Report

```

=====
Sorted By      :      Signal
Multiplier     :      1.0000
Dilution       :      1.0000
Use Multiplier & Dilution Factor with ISTDs
    
```

Signal 1: VWD1 A, Wavelength=210 nm

| Peak #   | RetTime [min] | Type | Width [min] | Area mAU  | Height [mAU] | Area %  |
|----------|---------------|------|-------------|-----------|--------------|---------|
| 1        | 17.090        | EB   | 0.7694      | 1.06940e4 | 211.36836    | 51.1064 |
| 2        | 30.263        | VB   | 1.5143      | 1.02310e4 | 101.32860    | 48.8936 |
| Totals : |               |      |             | 2.09251e4 | 312.69696    |         |

Data File D:\LC\THL\DATE\THL-6-86\THL-6-86 2010-11-18 15-51-39\012-0201.D  
 Sample Name: THL-6-86A

```

=====
Acq. Operator   : DXQ                               Seq. Line :    2
Acq. Instrument : Instrument 1                       Location  : Vial 12
Injection Date  : 11/18/2010 4:04:00 PM            Inj       :    1
                                                    Inj Volume: 5 µl
Acq. Method     : D:\LC\THL\DATE\THL-6-86\THL-6-86 2010-11-18 15-51-39\ASH-80-20-05ML-210NM-
30MIN.M
Last changed    : 11/18/2010 3:45:02 PM by DXQ
Analysis Method : D:\LC\THL\DATE\THL-6-86\THL-6-86 2010-11-18 15-51-39\012-0201.D\DA.M (ASH-
80-20-05ML-210NM-30MIN.M)
Last changed    : 2/20/2011 2:44:43 PM by LTL
                (modified after loading)
    
```

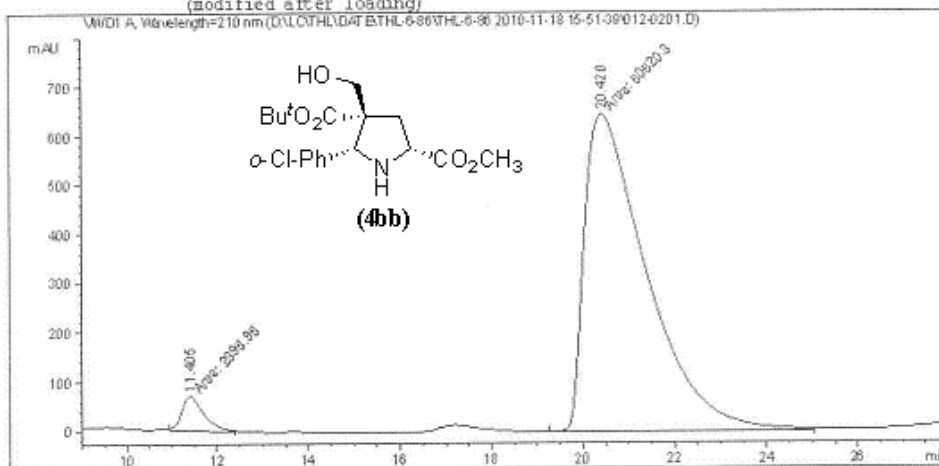

Area Percent Report

```

Sorted By      : Signal
Multiplier     : 1.0000
Dilution       : 1.0000
Use Multiplier & Dilution Factor with ISTDs
    
```

Signal 1: VWD1 A, Wavelength=210 nm

| Peak #   | RetTime [min] | Type | Width [min] | Area mAU *s | Height [mAU] | Area %  |
|----------|---------------|------|-------------|-------------|--------------|---------|
| 1        | 11.405        | MM   | 0.5780      | 2395.95239  | 69.09161     | 3.8021  |
| 2        | 20.420        | MM   | 1.5647      | 6.06203e4   | 645.72345    | 96.1979 |
| Totals : |               |      |             | 6.30162e4   | 714.81506    |         |

\*\*\* End of Report \*\*\*

data File D:\LC\THL\DATE\THL-6-86ARAC\THL-6-86ARAC 2010-11-17 16-38-33\004-0101.D  
 Sample Name: THL-6-86ARAC

```

=====
Acq. Operator   : DXQ                               Seq. Line :    1
Acq. Instrument : Instrument 1                       Location  : Vial 4
Injection Date  : 11/17/2010 4:39:50 PM            Inj       :    1
                                                    Inj Volume: 5 µl

Acq. Method     : D:\LC\THL\DATE\THL-6-86ARAC\THL-6-86ARAC 2010-11-17 16-38-33\ASH-80-20-
05ML-210NM.M
Last changed    : 11/6/2010 10:09:43 AM by TMC
Analysis Method : D:\LC\THL\DATE\THL-6-86ARAC\THL-6-86ARAC 2010-11-17 16-38-33\004-0101.D\
D.A.M (ASH-80-20-05ML-210NM.M)
Last changed    : 2/20/2011 2:42:10 PM by LTL
(modified after loading)
    
```

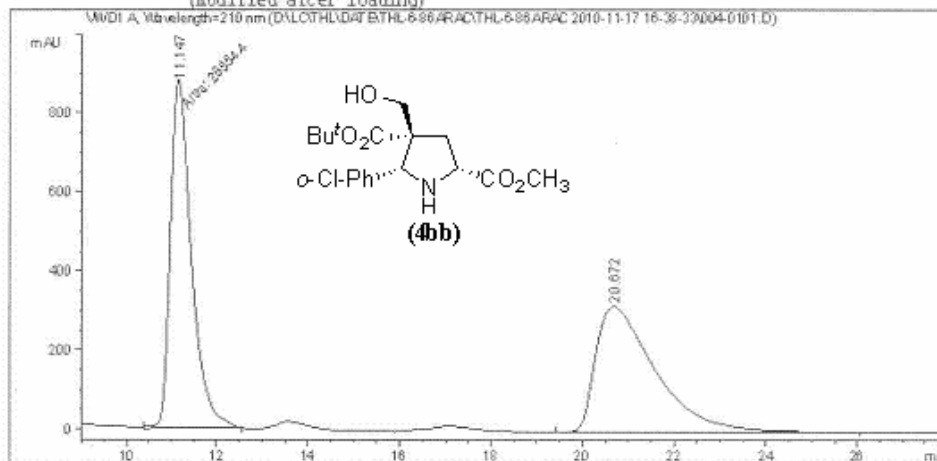

Area Percent Report

```

=====
Sorted By      :      Signal
Multiplier     :      1.0000
Dilution       :      1.0000
Use Multiplier & Dilution Factor with ISTDs
    
```

Signal 1: VMD1 A, Wavelength=210 nm

| Peak # | RetTime [min] | Type | Width [min] | Area mAU*s | Height [mAU] | Area %  |
|--------|---------------|------|-------------|------------|--------------|---------|
| 1      | 11.147        | PM   | 0.5400      | 2.85544e4  | 881.32373    | 49.8097 |
| 2      | 20.672        | VB   | 1.3519      | 2.87726e4  | 317.77271    | 50.1903 |

Totals : \* 5.73271e4 1199.09644

\*\*\* End of Report \*\*\*





Data File D:\LC\THL\DATE\THL-6-86DRAC\THL-6-86DRAC 2010-11-17 17-55-53\005-0101.D  
 Sample Name: THL-6-86DRAC

```

=====
Acq. Operator   : DXQ                               Seq. Line :    1
Acq. Instrument : Instrument 1                       Location  : Vial 5
Injection Date  : 11/17/2010 5:57:11 PM             Inj       :    1
                                                    Inj Volume: 5 µl

Acq. Method    : D:\LC\THL\DATE\THL-6-86DRAC\THL-6-86DRAC 2010-11-17 17-55-53\ASH-80-20-
05ML-210NM.M
Last changed   : 11/6/2010 10:09:43 AM by TMC
Analysis Method : D:\LC\THL\DATE\THL-6-86DRAC\THL-6-86DRAC 2010-11-17 17-55-53\005-0101.D\
DA.M (ASH-80-20-05ML-210NM.M)
Last changed   : 2/20/2011 2:49:43 PM by LTL
(modified after loading)
    
```

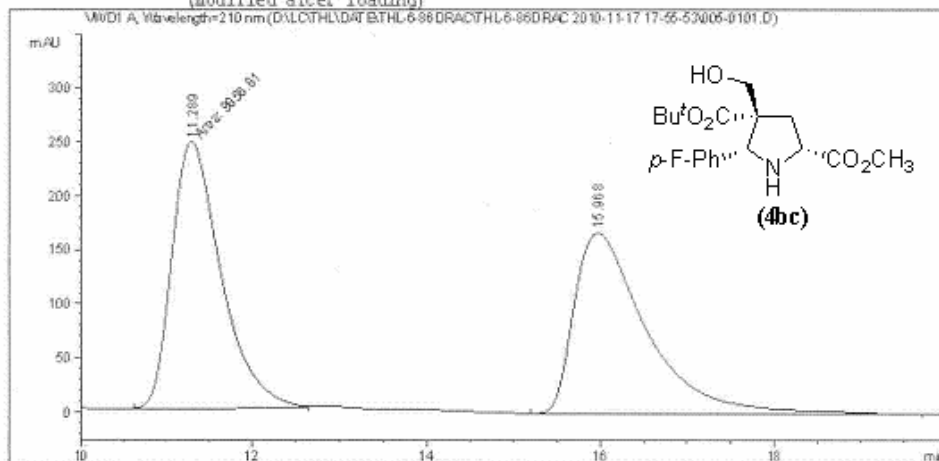

Area Percent Report

```

=====
Sorted By      :      Signal
Multiplier     :      1.0000
Dilution       :      1.0000
Use Multiplier & Dilution Factor with ISTDs
    
```

Signal 1: VWD1 λ, Wavelength=210 nm

| Peak #     | RetTime [min] | Type | Width [min] | Area mAU   | Height [mAU] | Area %  |
|------------|---------------|------|-------------|------------|--------------|---------|
| 1          | 11.289        | MM   | 0.6647      | 9856.80762 | 247.13208    | 50.3555 |
| 2          | 15.968        | VB   | 0.8718      | 9717.64160 | 166.81340    | 49.6445 |
| Totals : * |               |      |             | 1.95744e4  | 413.94548    |         |

\*\*\* End of Report \*\*\*



Data File D:\LC\THL\DATE\THL-6-108A\RAC\THL-6-108A-RAC 2010-11-27 14-48-47\071-0101.D  
 Sample Name: THL-6-108A-RAC

```

=====
Acq. Operator   : THL                               Seq. Line :    1
Acq. Instrument : Instrument 1                       Location  : Vial 71
Injection Date  : 11/27/2010 2:50:14 PM            Inj       :    1
                                                    Inj Volume: 5 µl

Acq. Method    : D:\LC\THL\DATE\THL-6-108A\RAC\THL-6-108A-RAC 2010-11-27 14-48-47\ASH-80-20-
                05ML-210NM-30MIN.M
Last changed   : 11/27/2010 2:50:10 PM by THL
                (modified after loading)
Analysis Method : D:\LC\THL\DATE\THL-6-108A\RAC\THL-6-108A-RAC 2010-11-27 14-48-47\071-0101.D
                D\DA.M (ASH-80-20-05ML-210NM-30MIN.M)
Last changed   : 2/20/2011 3:11:27 PM by LTL
                (modified after loading)
    
```

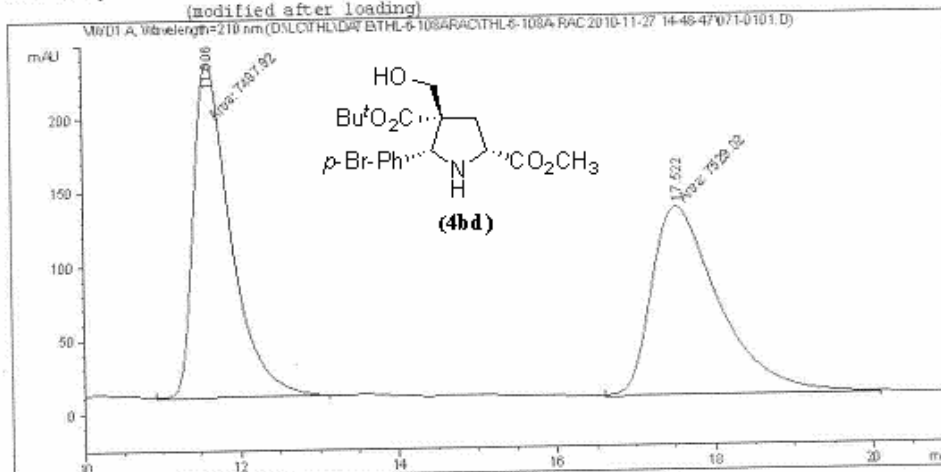

Area Percent Report

```

Sorted By      :      Signal
Multiplier     :      1.0000
Dilution       :      1.0000
Use Multiplier & Dilution Factor with ISTDs
    
```

Signal 1: WVD1 A, Wavelength=210 nm

| Peak #   | RetTime [min] | Type | Width [min] | Area mAU *s | Height [mAU] | Area %  |
|----------|---------------|------|-------------|-------------|--------------|---------|
| 1        | 11.606        | HM   | 0.5490      | 7487.92236  | 227.30307    | 49.8632 |
| 2        | 17.522        | HM   | 0.9841      | 7529.01611  | 127.51185    | 50.1368 |
| Totals : |               |      |             | 1.50169e4   | 354.81492    |         |

\*\*\* End of Report \*\*\*

Data File D:\LC\THL\DATE\THL-6-100\THL-6-100 2010-11-22 15-52-59\001-0201.D  
 Sample Name: THL-6-100B

```

=====
Acq. Operator   : tmc                      Seq. Line :    2
Acq. Instrument : Instrument 1              Location  : Vial 1
Injection Date  : 11/22/2010 4:05:19 PM    Inj       :    1
                                           Inj Volume: 5 µl
Acq. Method     : D:\LC\THL\DATE\THL-6-100\THL-6-100 2010-11-22 15-52-59\ASH-80-20-05ML-
                210MM-20MIN.M
Last changed    : 11/22/2010 3:49:52 PM by tmc
Analysis Method : D:\LC\THL\DATE\THL-6-100\THL-6-100 2010-11-22 15-52-59\001-0201.D\ADA.M (
                ASH-80-20-05ML-210MM-20MIN.M)
Last changed    : 2/20/2011 3:01:53 PM by LTL
                (modified after loading)
    
```

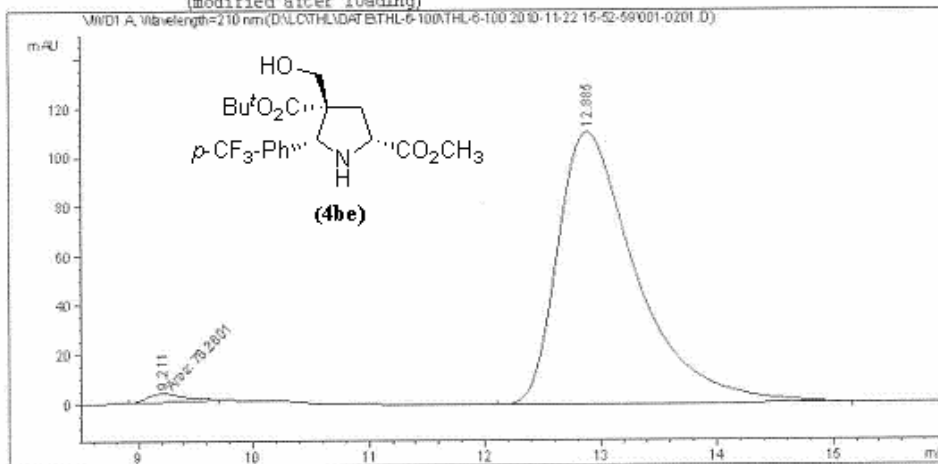

=====  
 Area Percent Report  
 =====

```

Sorted By      :      Signal
Multiplier     :      1.0000
Dilution       :      1.0000
Use Multiplier & Dilution Factor with ISTDs
    
```

Signal 1: VWD1 A, Wavelength=210 nm

| Peak #   | RetTime [min] | Type | Width [min] | Area mAU   | Height [mAU] | Area %  |
|----------|---------------|------|-------------|------------|--------------|---------|
| 1        | 9.211         | MM   | 0.3874      | 78.26009   | 3.36729      | 1.4803  |
| 2        | 12.885        | BB   | 0.7074      | 5208.34131 | 110.45015    | 98.5197 |
| Totals : |               |      |             | 5286.60140 | 113.81744    |         |

=====  
 \*\*\* End of Report \*\*\*

Data File D:\LC\THL\DATE\THL-6-100A-RAC\THL-6-100A-RAC 2010-11-21 15-49-47\008-0201.D  
 Sample Name: thl-6-100b-rac

```

=====
Acq. Operator   : THL                               Seq. Line :    2
Acq. Instrument : Instrument 1                       Location  : Vial 8
Injection Date  : 11/21/2010 4:17:40 PM             Inj       :    1
                                                    Inj Volume: 5 µl
Acq. Method     : D:\LC\THL\DATE\THL-6-100A-RAC\THL-6-100A-RAC 2010-11-21 15-49-47\ASH-80-
                20-05ML-210NM-30MIN.M
Last changed    : 11/21/2010 4:16:23 PM by THL
                (modified after loading)
Analysis Method : D:\LC\THL\DATE\THL-6-100A-RAC\THL-6-100A-RAC 2010-11-21 15-49-47\008-0201.
                D\DA.M (ASH-80-20-05ML-210NM-30MIN.M)
Last changed    : 2/20/2011 2:56:20 PM by LTL
                (modified after loading)
    
```

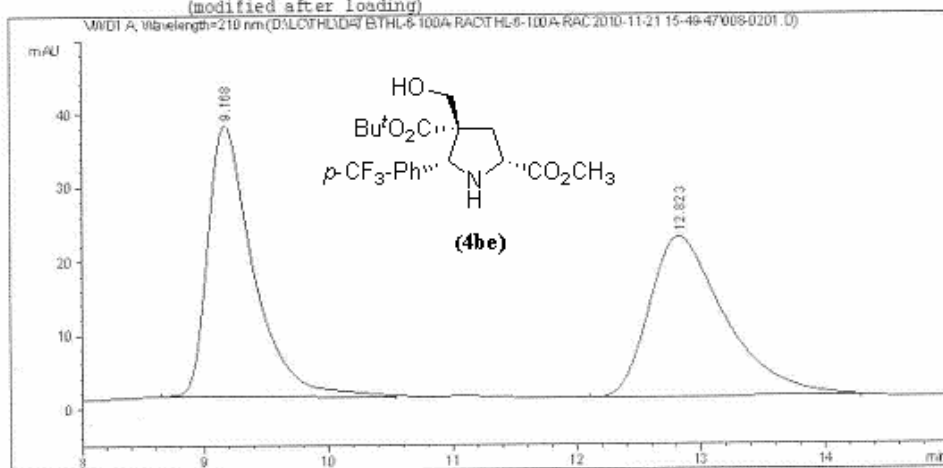

Area Percent Report

```

Sorted By      :      Signal
Multiplier     :      1.0000
Dilution       :      1.0000
Use Multiplier & Dilution Factor with ISTDs
    
```

Signal 1: VWD1 A, Wavelength=210 nm

| Peak #   | RetTime [min] | Type | Width [min] | Area mAU   | Area %   | Height [mAU] | Area %  |
|----------|---------------|------|-------------|------------|----------|--------------|---------|
| 1        | 9.168         | EB   | 0.3792      | 943.40753  | 50.7350  | 36.79168     | 50.7350 |
| 2        | 12.823        | EB   | 0.6295      | 916.07239  | 49.2650  | 21.75875     | 49.2650 |
| Totals : |               |      |             | 1859.47992 | 58.55042 |              |         |

\*\*\* End of Report \*\*\*

Data File D:\LC\THL\DATE\THL-6-86E-GH\THL-6-86E-GH 2010-11-20 09-02-37\015-0201.D  
 Sample Name: THL-6-86E

```

=====
Acq. Operator   : THL                               Seq. Line :    2
Acq. Instrument : Instrument 1                       Location  : Vial 15
Injection Date  : 11/20/2010 9:14:59 AM             Inj       :    1
                                                    Inj Volume: 5 µl

Acq. Method     : D:\LC\THL\DATE\THL-6-86E-GH\THL-6-86E-GH 2010-11-20 09-02-37\ADH-80-20-
                  OSML-230NM.M
Last changed    : 11/20/2010 9:00:31 AM by THL
Analysis Method : D:\LC\THL\DATE\THL-6-86E-GH\THL-6-86E-GH 2010-11-20 09-02-37\015-0201.D\
                  DA.M (ADH-80-20-OSML-230NM.M)
Last changed    : 2/20/2011 2:54:30 PM by LTL
                  (modified after loading)
    
```

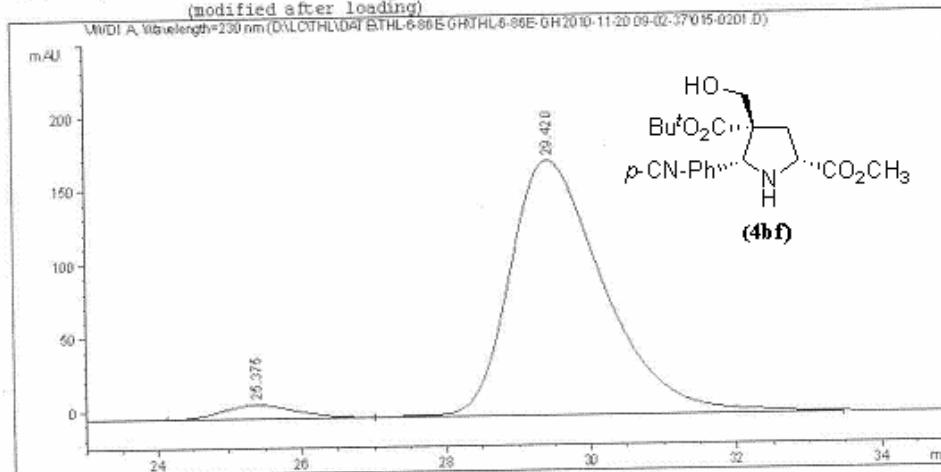

Area Percent Report

```

=====
Sorted By      : Signal
Multiplier     : 1.0000
Dilution      : 1.0000
Use Multiplier & Dilution Factor with ISTDs
    
```

Signal 1: VMD1 A, Wavelength=230 nm

| Peak # | RetTime [min] | Type | Width [min] | Area mAU*s | Height [mAU] | Area %  |
|--------|---------------|------|-------------|------------|--------------|---------|
| 1      | 25.375        | EV   | 1.0529      | 660.96613  | 9.38834      | 4.0807  |
| 2      | 29.420        | VB   | 1.3729      | 1.55366e4  | 172.69078    | 95.9193 |

Totals : 1.61976e4 182.07912

\*\*\* End of Report \*\*\*

Data File D:\LC\THL\DATE\THL-6-86ERAC\THL-6-86ERAC 2010-11-20 09-54-14\006-0101.D  
 Sample Name: THL-6-86ERAC

```

=====
Acq. Operator   : THL                               Seq. Line :    1
Acq. Instrument : Instrument 1                       Location  : Vial 6
Injection Date  : 11/20/2010 9:55:32 AM            Inj       :    1
                                                    Inj Volume: 5 µl
Acq. Method     : D:\LC\THL\DATE\THL-6-86ERAC\THL-6-86ERAC 2010-11-20 09-54-14\ADH-80-20-
                05ML-230NM.M
Last changed    : 11/20/2010 9:00:31 AM by THL
Analysis Method : D:\LC\THL\DATE\THL-6-86ERAC\THL-6-86ERAC 2010-11-20 09-54-14\006-0101.D\
                DA.M (ADH-80-20-05ML-230NM.M)
Last changed    : 2/20/2011 2:53:12 PM by LTL
                (modified after loading)
    
```

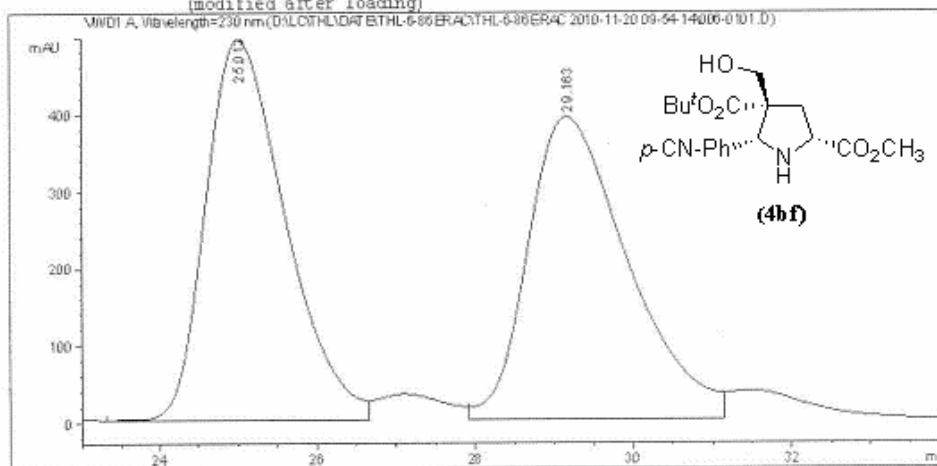

Area Percent Report

```

=====
Sorted By      : Signal
Multiplier     : 1.0000
Dilution       : 1.0000
Use Multiplier & Dilution Factor with ISTDs
    
```

Signal 1: VWD1 A, Wavelength=230 nm

| Peak #   | RetTime [min] | Type | Width [min] | Area mAU  | Height [mAU] | Area %  |
|----------|---------------|------|-------------|-----------|--------------|---------|
| 1        | 25.013        | WV   | 1.0858      | 3.44202e4 | 491.82541    | 50.0072 |
| 2        | 29.163        | WV   | 1.3377      | 3.44103e4 | 392.34802    | 49.9928 |
| Totals : |               |      |             | 6.88305e4 | 884.17343    |         |

\*\*\* End of Report \*\*\*

Data File D:\LC\THL\DATE\THL-6-100\THL-6-100 2010-11-22 15-52-59\016-0601.D  
 Sample Name: THL-6-100A

```

=====
Acq. Operator   : tmc                               Seq. Line :    6
Acq. Instrument : Instrument 1                       Location  : Vial 16
Injection Date  : 11/22/2010 5:20:40 PM            Inj       :    1
                                                    Inj Volume: 5 µl

Acq. Method     : D:\LC\THL\DATE\THL-6-100\THL-6-100 2010-11-22 15-52-59\ASH-80-20-05ML-
                210NM-25MIN.M
Last changed    : 11/18/2010 3:45:30 PM by DXX
Analysis Method : D:\LC\THL\DATE\THL-6-100\THL-6-100 2010-11-22 15-52-59\016-0601.D\DA.M (
                ASH-80-20-05ML-210NM-25MIN.M)
Last changed    : 2/20/2011 2:59:15 PM by LTL
                (modified after loading)
    
```

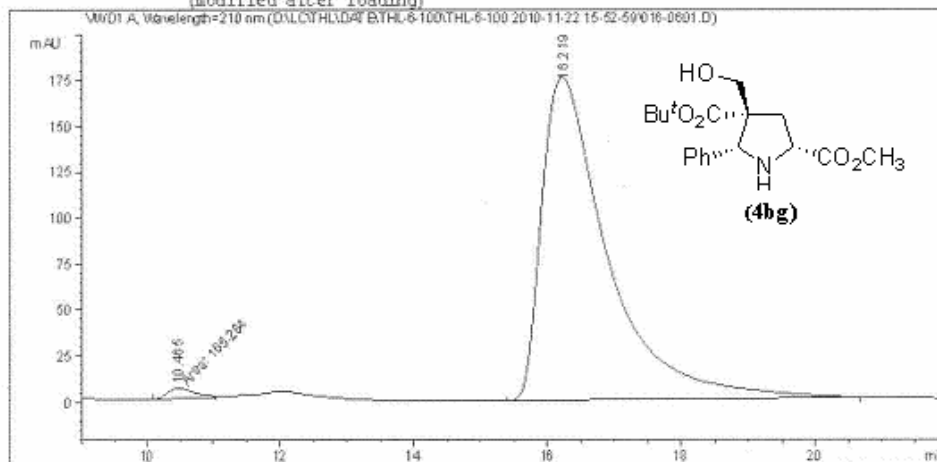

Area Percent Report

```

=====
Sorted By      :      Signal
Multiplier     :      1.0000
Dilution       :      1.0000
Use Multiplier & Dilution Factor with ISIDs
    
```

Signal 1: VMD1 A, Wavelength=210 nm

| Peak #   | RetTime [min] | Type | Width [min] | Area mAU  | Area %    | Height [mAU] | Area % |
|----------|---------------|------|-------------|-----------|-----------|--------------|--------|
| 1        | 10.465        | MM   | 0.4954      | 165.28436 | 5.56080   | 1.3536       |        |
| 2        | 16.219        | EB   | 1.0167      | 1.20450e4 | 175.71765 | 98.6464      |        |
| Totals : |               |      |             | 1.22103e4 | 181.27845 |              |        |

\*\*\* End of Report \*\*\*





Data File D:\LC\THL\DATE\THL-6-100\THL-6-100 2010-11-22 15-52-59\002-0401.D  
 Sample Name: THL-6-100C

```

=====
Acq. Operator   : tmc                      Seq. Line :    4
Acq. Instrument : Instrument 1              Location  : Vial 2
Injection Date  : 11/22/2010 4:37:58 PM    Inj       :    1
                                           Inj Volume: 5 µl
Acq. Method    : D:\LC\THL\DATE\THL-6-100\THL-6-100 2010-11-22 15-52-59\CDH-80-20-0SML-
                210NM-35MIN.M
Last changed   : 11/22/2010 5:07:23 PM by tmc
                (modified after loading)
Analysis Method: D:\LC\THL\DATE\THL-6-100\THL-6-100 2010-11-22 15-52-59\002-0401.D\DA.M (
                CDH-80-20-0SML-210NM-35MIN.M)
Last changed   : 2/20/2011 3:05:29 PM by LTL
                (modified after loading)
    
```

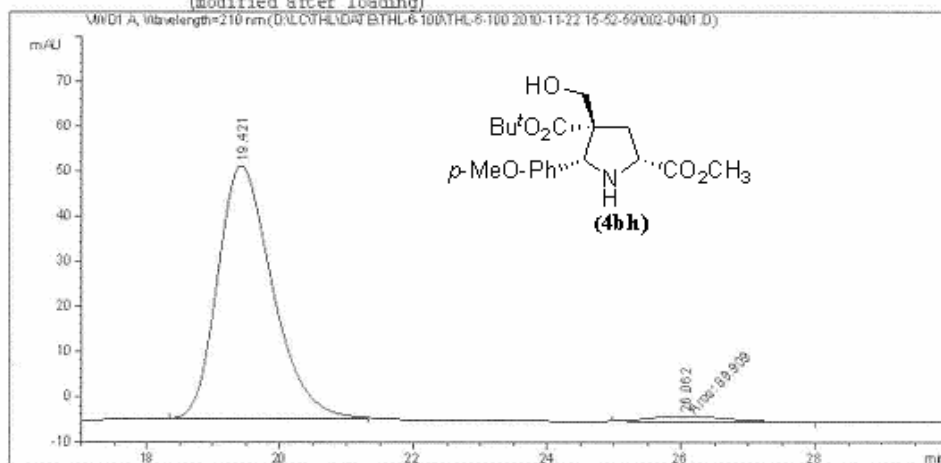

Area Percent Report

```

Sorted By      :      Signal
Multiplier     :      1.0000
Dilution       :      1.0000
Use Multiplier & Dilution Factor with ISTDs
    
```

Signal 1: VWD1 A, Wavelength=210 nm

| Peak # | RetTime [min] | Type | Width [min] | Area mAU *s | Height [mAU] | Area %  |
|--------|---------------|------|-------------|-------------|--------------|---------|
| 1      | 19.421        | BB   | 0.8741      | 3174.64624  | 55.98981     | 97.2459 |
| 2      | 26.062        | MM   | 1.3586      | 89.90903    | 1.10300      | 2.7541  |

Totals : 3264.55527 57.09281

\*\*\* End of Report \*\*\*

Data File D:\LC\THL\DATE\THL-6-100C-RAC\THL-6-100C-RAC 2010-11-21 19-45-51\009-0101.D  
 Sample Name: THL-6-103C-RAC

```

=====
Acq. Operator   : THL                               Seq. Line :    1
Acq. Instrument : Instrument 1                       Location  : Vial 9
Injection Date  : 11/21/2010 7:47:22 PM           Inj       :    1
                                                    Inj Volume: 5 µl
Acq. Method     : D:\LC\THL\DATE\THL-6-100C-RAC\THL-6-100C-RAC 2010-11-21 19-45-51\009-80-
                20-05ML-210NM.M
Last changed    : 11/21/2010 8:18:26 PM by THL
                (modified after loading)
Analysis Method : D:\LC\THL\DATE\THL-6-100C-RAC\THL-6-100C-RAC 2010-11-21 19-45-51\009-0101.
                D\DA.M (009-80-20-05ML-210NM.M)
Last changed    : 2/20/2011 3:03:33 PM by LTL
                (modified after loading)
    
```

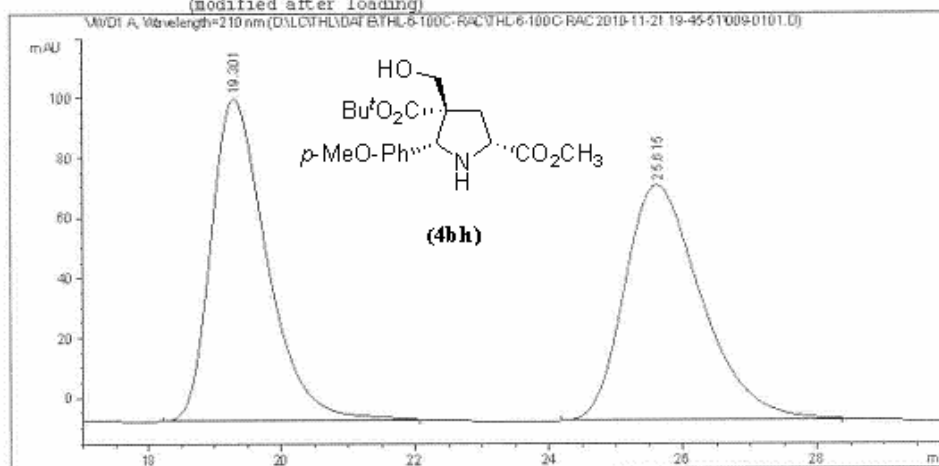

Area Percent Report

```

Sorted By      : Signal
Multiplier     : 1.0000
Dilution       : 1.0000
Use Multiplier & Dilution Factor with ISTDs
    
```

Signal 1: VWD1 A, Wavelength=210 nm

| Peak #   | RetTime [min] | Type | Width [min] | Area mAU *s | Height [mAU] | Area %  |
|----------|---------------|------|-------------|-------------|--------------|---------|
| 1        | 19.301        | BB   | 0.8868      | 6220.93457  | 107.18763    | 50.1816 |
| 2        | 25.615        | BB   | 1.2126      | 6175.89697  | 78.07592     | 49.8184 |
| Totals : |               |      |             | 1.23968e4   | 185.26355    |         |

\*\*\* End of Report \*\*\*

Data File D:\LC\THL\DATE\THL-6-108\THL-6-108 2010-11-29 15-59-47\063-0801.D  
 Sample Name: THL-6-108C

```

=====
Acq. Operator   : THL                               Seq. Line :    8
Acq. Instrument : Instrument 1                       Location  : Vial 63
Injection Date  : 11/29/2010 6:51:22 PM             Inj       :    1
                                                    Inj Volume: 5 µl
Acq. Method     : D:\LC\THL\DATE\THL-6-108\THL-6-108 2010-11-29 15-59-47\ODH-80-20-05ML-
                210NM-30MIN.M
Last changed    : 11/29/2010 8:55:30 AM by THL
Analysis Method : D:\LC\THL\DATE\THL-6-108\THL-6-108 2010-11-29 15-59-47\063-0801.D\DA.M (
                ODH-80-20-05ML-210NM-30MIN.M)
Last changed    : 2/20/2011 3:23:52 PM by LTL
                (modified after loading)
    
```

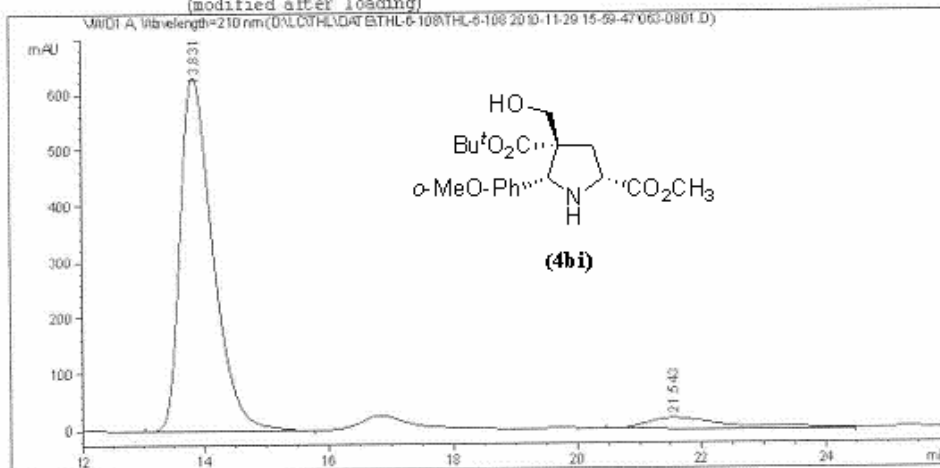

Area Percent Report

```

Sorted By      : Signal
Multiplier     : 1.0000
Dilution       : 1.0000
Use Multiplier & Dilution Factor with ISTDs
    
```

Signal 1: VWD1 A, Wavelength=210 nm

| Peak #   | RetTime [min] | Type | Width [min] | Area mAU   | Area %  | Height [mAU] |
|----------|---------------|------|-------------|------------|---------|--------------|
| 1        | 13.831        | BB   | 0.5659      | 2.34379e4  | 92.9419 | 633.10199    |
| 2        | 21.543        | VV   | 1.2564      | 1779.89026 | 7.0581  | 19.89404     |
| Totals : |               |      |             | 2.52178e4  |         | 652.99603    |

\*\*\* End of Report \*\*\*

Data File D:\LC\THL\DATE\THL-6-108C-RAC\THL-6-108C-RAC 2010-11-29 08-57-25\001-0201.D  
 Sample Name: THL-6-108CRAC

```

=====
Acq. Operator   : THL                               Seq. Line :    2
Acq. Instrument : Instrument 1                       Location  : Vial 1
Injection Date  : 11/29/2010 9:09:48 AM            Inj       :    1
                                                    Inj Volume: 5 µl

Acq. Method     : D:\LC\THL\DATE\THL-6-108C-RAC\THL-6-108C-RAC 2010-11-29 08-57-25\ODH-80-
                20-0SML-210NM-30MIN.M
Last changed    : 11/29/2010 8:55:30 AM by THL
Analysis Method : D:\LC\THL\DATE\THL-6-108C-RAC\THL-6-108C-RAC 2010-11-29 08-57-25\001-0201.
                D\DA.M (GDH-80-20-0SML-210NM-30MIN.M)
Last changed    : 2/20/2011 3:22:06 PM by LTL
                (modified after loading)
    
```

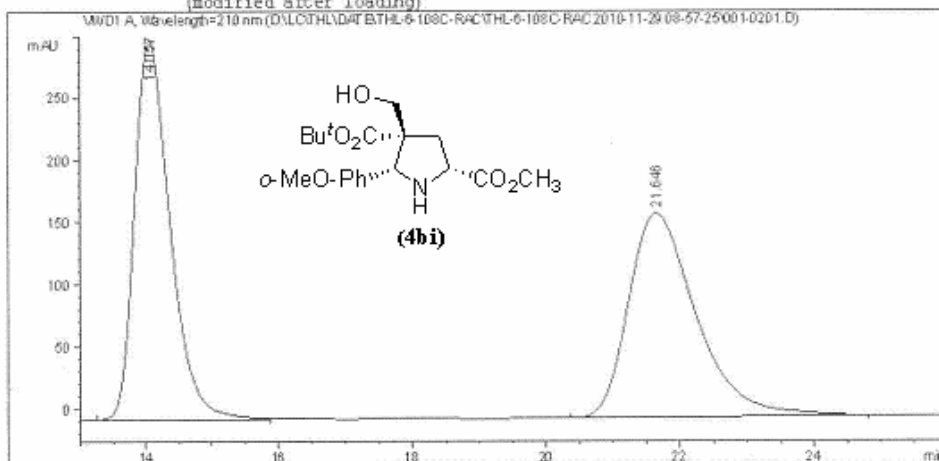

Area Percent Report

```

=====
Sorted By      : Signal
Multiplier     : 1.0000
Dilution      : 1.0000
Use Multiplier & Dilution Factor with ISTDs
    
```

Signal 1: VMD1 A, Wavelength=210 nm

| Peak #   | RetTime [min] | Type | Width [min] | Area mAU  | Height [mAU] | Area %  |
|----------|---------------|------|-------------|-----------|--------------|---------|
| 1        | 14.057        | EB   | 0.5795      | 1.14925e4 | 303.94165    | 50.2985 |
| 2        | 21.646        | EB   | 1.0670      | 1.13561e4 | 163.11961    | 49.7015 |
| Totals : |               |      |             | 2.28486e4 | 467.06126    |         |

\*\*\* End of Report \*\*\*

Data File D:\LC\THL\DATE\THL-6-108\THL-6-108 2010-11-29 15-59-47\062-0301.D  
 Sample Name: THL-6-108E

```

=====
Acq. Operator   : THL                               Seq. Line :    3
Acq. Instrument : Instrument 1                       Location  : Vial 62
Injection Date  : 11/29/2010 4:38:48 PM            Inj       :    1
                                                    Inj Volume: 5 µl
Acq. Method     : D:\LC\THL\DATE\THL-6-108\THL-6-108 2010-11-29 15-59-47\ASH-80-20-0SML-
                210NM-30MIN.M
Last changed    : 11/18/2010 3:45:02 PM by DXQ
Analysis Method : D:\LC\THL\DATE\THL-6-108\THL-6-108 2010-11-29 15-59-47\062-0301.D\DA.M (
                ASH-80-20-0SML-210NM-30MIN.M)
Last changed    : 2/20/2011 3:18:36 PM by LTL
                (modified after loading)
    
```

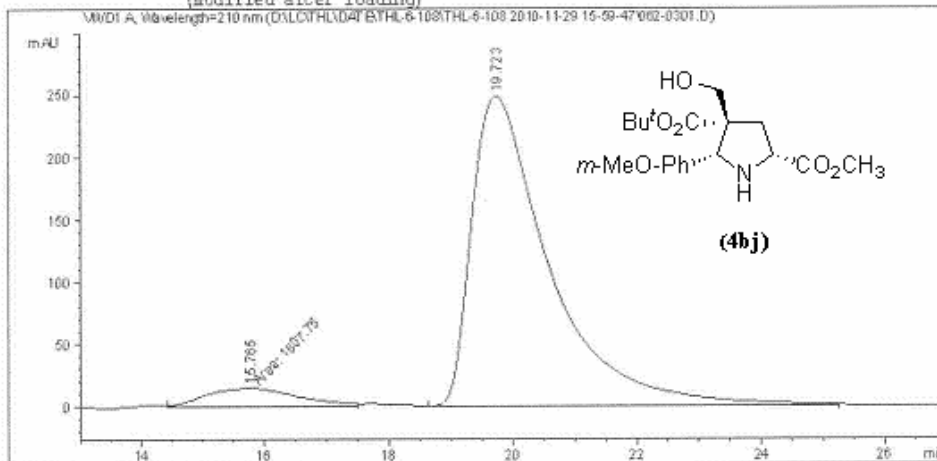

Area Percent Report

```

=====
Sorted By      : Signal
Multiplier     : 1.0000
Dilution       : 1.0000
Use Multiplier & Dilution Factor with ISTDs
    
```

Signal 1: VWD1 A, Wavelength=210 nm

| Peak #   | RetTime [min] | Type | Width [min] | Area mAU*s | Height [mAU] | Area %  |
|----------|---------------|------|-------------|------------|--------------|---------|
| 1        | 15.765        | MF   | 1.7615      | 1607.74609 | 15.21164     | 6.9718  |
| 2        | 19.723        | VB   | 1.2790      | 2.14531e4  | 248.26463    | 93.0282 |
| Totals : |               |      |             | 2.30608e4  | 263.47628    |         |

\*\*\* End of Report \*\*\*



Data File D:\LC\THL\DATE\THL-6-108\THL-6-108 2010-11-29 15-59-47\065-0501.D  
 Sample Name: THL-6-108E

```

=====
Acq. Operator   : THL                               Seq. Line :    5
Acq. Instrument : Instrument 1                       Location  : Vial 65
Injection Date  : 11/29/2010 5:37:19 PM            Inj       :    1
                                                    Inj Volume: 5 µl
Acq. Method     : D:\LC\THL\DATE\THL-6-108\THL-6-108 2010-11-29 15-59-47\ASH-60-20-05ML-
                254NM-30MIN.M
Last changed    : 11/22/2010 4:59:06 PM by THL
Analysis Method : D:\LC\THL\DATE\THL-6-108\THL-6-108 2010-11-29 15-59-47\065-0501.D\DA.M (
                ASH-60-20-05ML-254NM-30MIN.M)
Last changed    : 2/20/2011 3:25:58 PM by LTL
                (modified after loading)
    
```

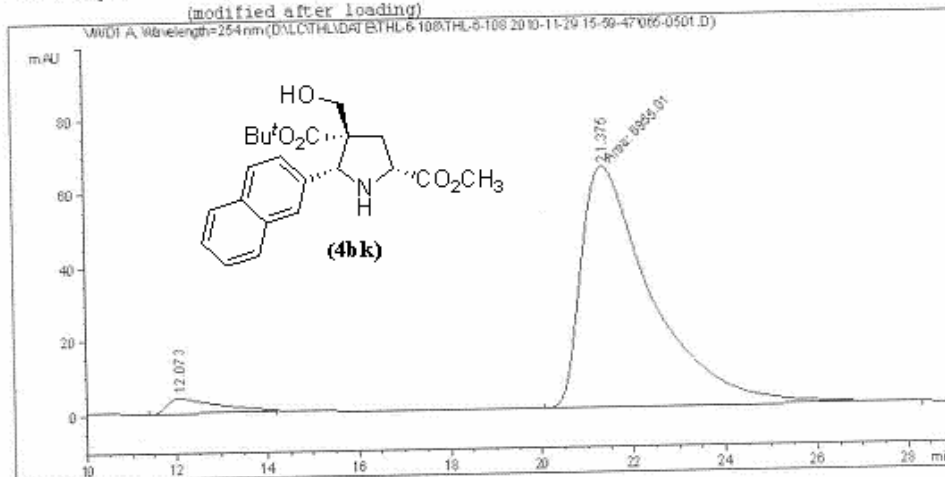

Area Percent Report

```

Sorted By      : Signal
Multiplier     : 1.0000
Dilution       : 1.0000
Use Multiplier & Dilution Factor with ISTDs
    
```

Signal 1: VWD1 A, Wavelength=254 nm

| Peak #   | RetTime [min] | Type | Width [min] | Area mAU   | Area %   | Height [mAU] | Area %  |
|----------|---------------|------|-------------|------------|----------|--------------|---------|
| 1        | 12.073        | EB   | 1.0069      | 315.87769  | 4.3444   | 4.18676      | 4.3444  |
| 2        | 21.375        | NM   | 1.7738      | 6955.00781 | 95.6556  | 65.34890     | 95.6556 |
| Totals : |               |      |             | 7270.88550 | 69.53566 |              |         |

\*\*\* End of Report \*\*\*



Data File D:\LC\THL\DATE\THL-6-108C-E\THL-6-108C-E-RAC 2010-11-28 13-34-30\003-0301.D  
 Sample Name: THL-6-108E-RAC

```

=====
Acq. Operator   : THL                               Seq. Line :    3
Acq. Instrument : Instrument 1                       Location  : Vial 3
Injection Date  : 11/28/2010 2:38:48 PM             Inj       :    1
                                                    Inj Volume: 5 µl
Acq. Method     : D:\LC\THL\DATE\THL-6-108C-E\THL-6-108C-E-RAC 2010-11-28 13-34-30\ASH-80-
                20-0SML-254NM-30MIN.M
Last changed    : 11/22/2010 4:59:06 PM by THL
Analysis Method : D:\LC\THL\DATE\THL-6-108C-E\THL-6-108C-E-RAC 2010-11-28 13-34-30\003-0301.
                D\DA.M (ASH-80-20-0SML-254NM-30MIN.M)
Last changed    : 2/20/2011 3:27:10 PM by LTL
                (modified after loading)
    
```

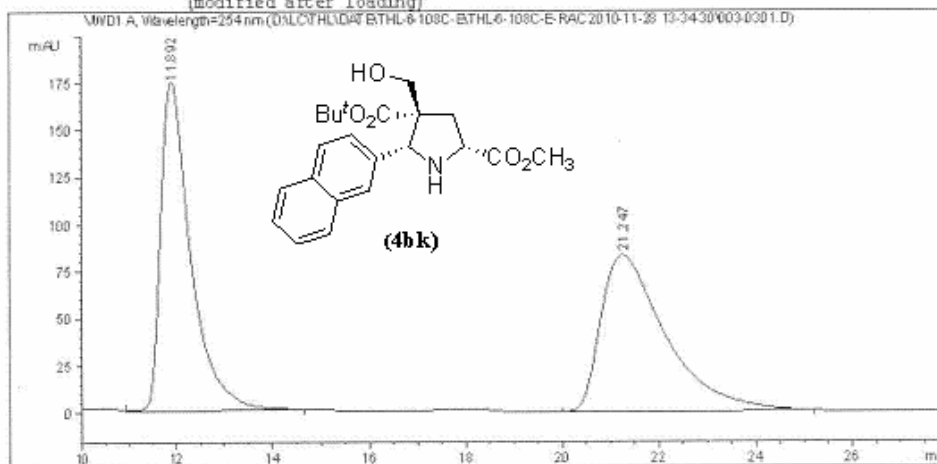

Area Percent Report

```

=====
Sorted By      : Signal
Multiplier     : 1.0000
Dilution       : 1.0000
Use Multiplier & Dilution Factor with ISTDs
    
```

Signal 1: VWD1 A, Wavelength=254 nm

| Peak #   | RetTime [min] | Type | Width [min] | Area mAU   | Height [mAU] | Area %  |
|----------|---------------|------|-------------|------------|--------------|---------|
| 1        | 11.892        | VB   | 0.6554      | 7713.11719 | 174.50972    | 50.2175 |
| 2        | 21.247        | EB   | 1.3726      | 7646.30957 | 82.71335     | 49.7825 |
| Totals : |               |      |             | 1.53594e4  | 257.22307    |         |

\*\*\* End of Report \*\*\*

Data File D:\LC\THL\DATE\THL-6-100\THL-6-100 2010-11-22 15-52-59\017-0701.D  
 Sample Name: THL-6-100D

```

=====
Acq. Operator   : tmc                      Seq. Line :    7
Acq. Instrument : Instrument 1              Location  : Vial 17
Injection Date  : 11/22/2010 5:47:16 PM   Inj       :    1
                                           Inj Volume: 5 µl
Acq. Method     : D:\LC\THL\DATE\THL-6-100\THL-6-100 2010-11-22 15-52-59\ASH-80-20-05ML-
254NM-30MIN.M
Last changed    : 11/22/2010 4:59:06 PM by THL
Analysis Method : D:\LC\THL\DATE\THL-6-100\THL-6-100 2010-11-22 15-52-59\017-0701.D\DA.M (
ASH-80-20-05ML-254NM-30MIN.M)
Last changed    : 2/20/2011 3:09:34 PM by LTL
(modified after loading)
    
```

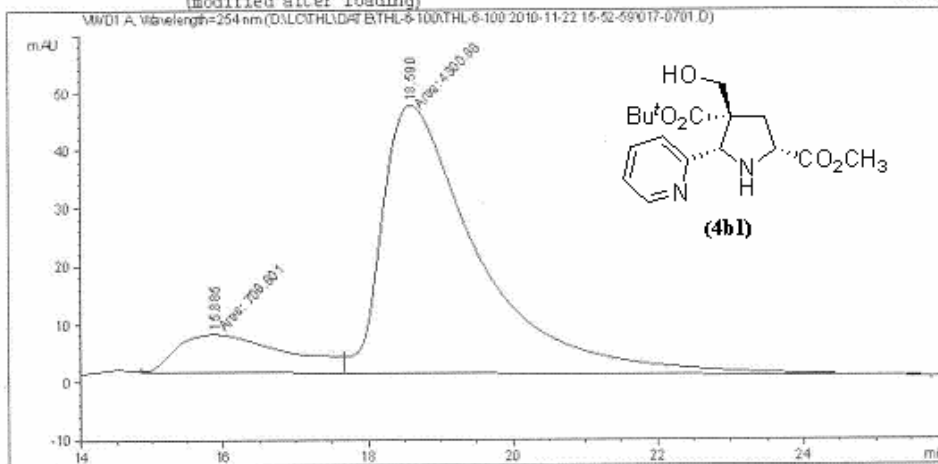

Area Percent Report

```

=====
Sorted By      : Signal
Multiplier     : 1.0000
Dilution       : 1.0000
Use Multiplier & Dilution Factor with ISTDs
    
```

Signal 1: VMD1 A, Wavelength=254 nm

| Peak #   | RetTime [min] | Type | Width [min] | Area mAU   | Area %   | Height [mAU] | Area %   |
|----------|---------------|------|-------------|------------|----------|--------------|----------|
| 1        | 15.885        | MF   | 1.7728      | 708.80109  | 14.1486  | 6.66365      | 14.1486  |
| 2        | 18.590        | FM   | 1.5497      | 4300.87598 | 85.8514  | 46.25590     | 85.8514  |
| Totals : |               |      |             | 5009.67706 | 100.0000 | 52.91955     | 100.0000 |

\*\*\* End of Report \*\*\*

Data File D:\LC\THL\DATE\THL-6-100C-D-RAC\THL-6-100C-D-RAC 2010-11-21 18-03-07\010-0201.D  
 Sample Name: THL-6-66D-rac

```

=====
Acq. Operator   : THL                               Seq. Line :    2
Acq. Instrument : Instrument 1                       Location  : Vial 10
Injection Date  : 11/21/2010 6:32:17 PM             Inj       :    1
                                                    Inj Volume: 5 µl
Acq. Method     : D:\LC\THL\DATE\THL-6-100C-D-RAC\THL-6-100C-D-RAC 2010-11-21 18-03-07\ASH-
80-20-05ML-254NM.M
Last changed    : 11/21/2010 6:13:57 PM by THL
Analysis Method : D:\LC\THL\DATE\THL-6-100C-D-RAC\THL-6-100C-D-RAC 2010-11-21 18-03-07\010-
0201.D\DA.M (ASH-80-20-05ML-254NM.M)
Last changed    : 2/20/2011 3:07:10 PM by LTL
                (modified after loading)
    
```

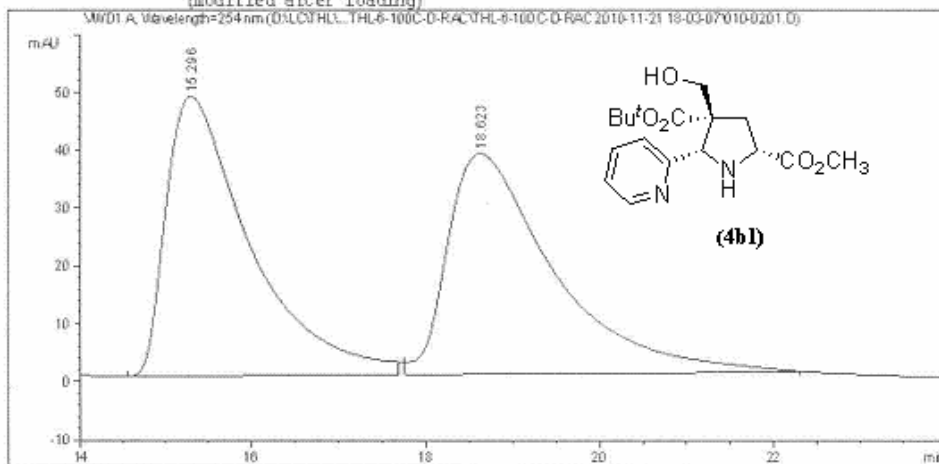

Area Percent Report

```

=====
Sorted By      : Signal
Multiplier     : 1.0000
Dilution       : 1.0000
Use Multiplier & Dilution Factor with ISTDs
    
```

Signal 1: VMD1 A, Wavelength=254 nm

| Peak #     | RetTime [min] | Type | Width [min] | Area mAU   | Height [mAU] | Area %  |
|------------|---------------|------|-------------|------------|--------------|---------|
| 1          | 15.296        | EB   | 0.9920      | 3269.29102 | 48.30249     | 50.1562 |
| 2          | 18.623        | EB   | 1.2401      | 3248.93408 | 38.18611     | 49.8438 |
| Totals : * |               |      |             | 6518.22510 | 86.48861     |         |

\*\*\* End of Report \*\*\*

Data File D:\LC\DXQ\DATE\DXQ-9-48\DXQ-9-48AB-ENE 2010-11-30 20-18-33\006-1201.D  
 Sample Name: THL-6-116A

```

=====
Acq. Operator   : dxq                               Seq. Line : 12
Acq. Instrument : Instrument 1                       Location  : Vial 6
Injection Date  : 12/1/2010 1:25:13 AM              Inj       : 1
                                                    Inj Volume: 5 µl
Acq. Method    : D:\LC\DXQ\DATE\DXQ-9-48\DXQ-9-48AB-ENE 2010-11-30 20-18-33\ADH-70-30-1ML-
                210NM-25MIN.M
Last changed   : 11/29/2010 6:11:42 PM by THL
Analysis Method: D:\LC\DXQ\DATE\DXQ-9-48\DXQ-9-48AB-ENE 2010-11-30 20-18-33\006-1201.D\DA.M
                (ADH-70-30-1ML-210NM-25MIN.M)
Last changed   : 2/20/2011 3:43:39 PM by LTL
                (modified after loading)
    
```

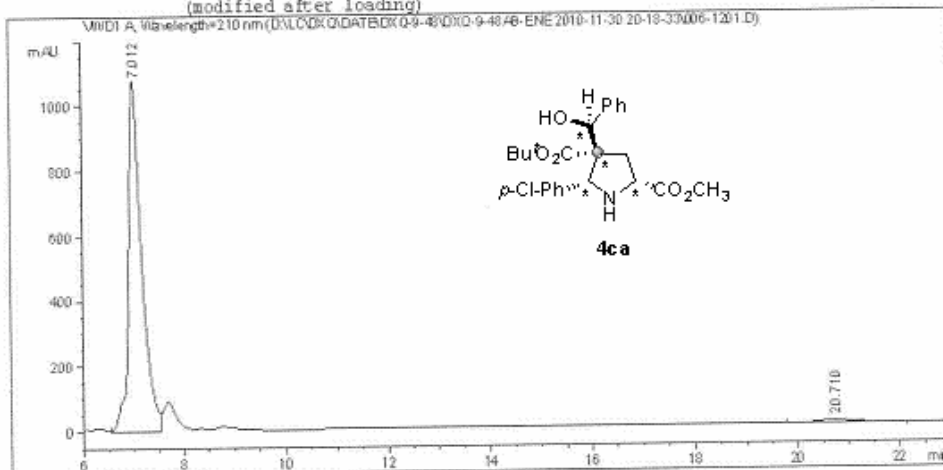

Area Percent Report

```

Sorted By      : Signal
Multiplier     : 1.0000
Dilution       : 1.0000
Use Multiplier & Dilution Factor with ISTDs
    
```

Signal 1: VWD1 A, Wavelength=210 nm

| Peak # | RetTime [min] | Type | Width [min] | Area mAU  | Area %  | Height [mAU] | Area %  |
|--------|---------------|------|-------------|-----------|---------|--------------|---------|
| 1      | 7.012         | WV   | 0.2698      | 1.99766e4 | 97.2547 | 1079.10962   | 97.2547 |
| 2      | 20.710        | EB   | 0.7706      | 563.88904 | 2.7453  | 10.88027     | 2.7453  |

Totals : 2.05405e4 1089.98989

\*\*\* End of Report \*\*\*

Data File D:\LC\THL\DATE\THL-6-76\THL-6-76 2010-11-12 17-39-05\001-0101.D  
 Sample Name: THL-6-76A

```

=====
Acq. Operator   : DXQ                               Seq. Line :    1
Acq. Instrument : Instrument 1                       Location  : Vial 1
Injection Date  : 11/12/2010 5:40:21 PM             Inj       :    1
                                                    Inj Volume: 5 µl
Acq. Method    : D:\LC\THL\DATE\THL-6-76\THL-6-76 2010-11-12 17-39-05\ADH-70-30-1ML210NM-
                25MIN.M
Last changed   : 11/5/2010 8:32:44 PM by thl
Analysis Method: D:\LC\THL\DATE\THL-6-76\THL-6-76 2010-11-12 17-39-05\001-0101.D\DA.M (ADH-
                70-30-1ML210NM-25MIN.M)
Last changed   : 2/20/2011 3:39:01 PM by LTL
                (modified after loading)
    
```

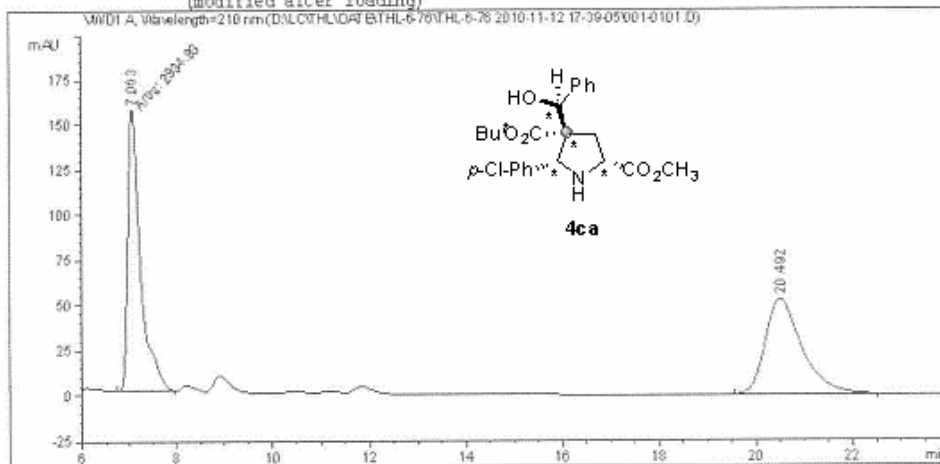

Area Percent Report

```

Sorted By      : Signal
Multiplier     : 1.0000
Dilution       : 1.0000
Use Multiplier & Dilution Factor with ISTDs
    
```

Signal 1: VWD1 A, Wavelength=210 nm

| Peak #   | RetTime [min] | Type | Width [min] | Area [mAU*s] | Height [mAU] | Area %  |
|----------|---------------|------|-------------|--------------|--------------|---------|
| 1        | 7.063         | MM   | 0.3138      | 2934.92993   | 155.87706    | 51.5484 |
| 2        | 20.492        | BB   | 0.7838      | 2758.60962   | 52.84193     | 48.4516 |
| Totals : |               |      |             | 5693.53955   | 208.71899    |         |

\*\*\* End of Report \*\*\*

ata File D:\LC\THL\DATE\THL-6-116\THL-6-116 2011-02-21 10-02-32\002-0301.D  
 ample Name: thl-116b

```

=====
Acq. Operator   : thl                      Seq. Line :    3
Acq. Instrument : Instrument 1             Location  : Vial 2
Injection Date  : 2/21/2011 10:56:27 AM   Inj       :    1
                                           Inj Volume: 5 µl
Acq. Method     : D:\LC\THL\DATE\THL-6-116\THL-6-116 2011-02-21 10-02-32\ASH-90-10-05ML-
21QNM-40MIN.M
Last changed    : 2/21/2011 10:55:14 AM by thl
(modified after loading)
Analysis Method : D:\LC\THL\DATE\THL-6-116\THL-6-116 2011-02-21 10-02-32\002-0301.D\DA.M (
ASH-90-10-05ML-21QNM-40MIN.M)
Last changed    : 2/21/2011 12:04:56 PM by LTL
(modified after loading)
    
```

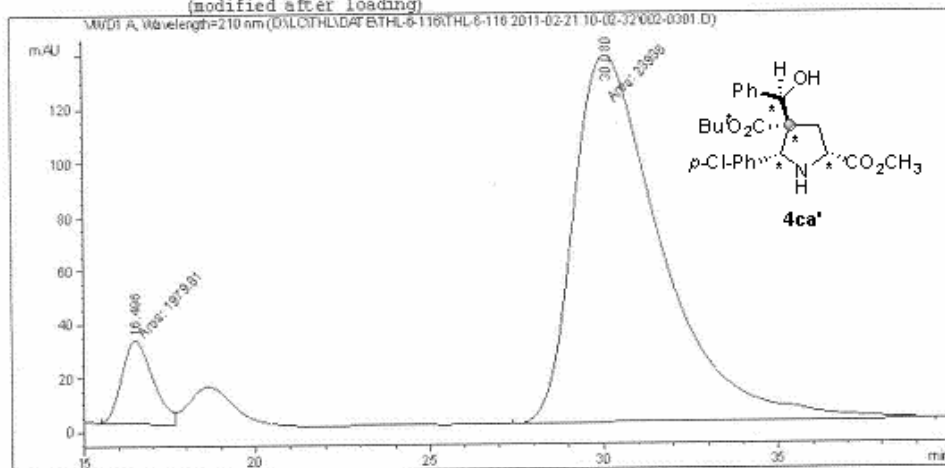

Area Percent Report

```

Sorted By      :      Signal
Multiplier     :      1.0000
Dilution       :      1.0000
Use Multiplier & Dilution Factor with ISTDs
    
```

Signal 1: VWD1 A, Wavelength=210 nm

| Peak #   | RetTime [min] | Type | Width [min] | Area mAU   | Area %    | Height [mAU] | Area %  |
|----------|---------------|------|-------------|------------|-----------|--------------|---------|
| 1        | 16.496        | MF   | 1.0656      | 1979.80640 | 7.6394    | 30.93568     | 7.6394  |
| 2        | 30.080        | MM   | 2.9157      | 2.39360e4  | 92.3606   | 136.82176    | 92.3606 |
| Totals : |               |      |             | 2.59158e4  | 167.75745 |              |         |

\*\*\* End of Report \*\*\*

File D:\LC\THL\DATE\THL-6-116\THL-6-116 2011-02-21 10-02-32\001-0201.D  
 Name: thl-6-116b-rec

```

=====
cq. Operator   : thl                               Seq. Line :    2
cq. Instrument : Instrument 1                       Location  : Vial 1
Injection Date : 2/21/2011 10:14:58 AM            Inj       :    1
                                                    Inj Volume: 5 µl

cq. Method    : D:\LC\THL\DATE\THL-6-116\THL-6-116 2011-02-21 10-02-32\ASH-90-10-05ML-
210NM-40MIN.M
ast changed   : 2/21/2011 10:51:13 AM by thl
(modified after loading)
analysis Method : D:\LC\THL\DATE\THL-6-116\THL-6-116 2011-02-21 10-02-32\001-0201.D\DA.H (
ASH-90-10-05ML-210NM-40MIN.M)
ast changed   : 2/21/2011 11:00:37 AM by LTL
(modified after loading)
    
```

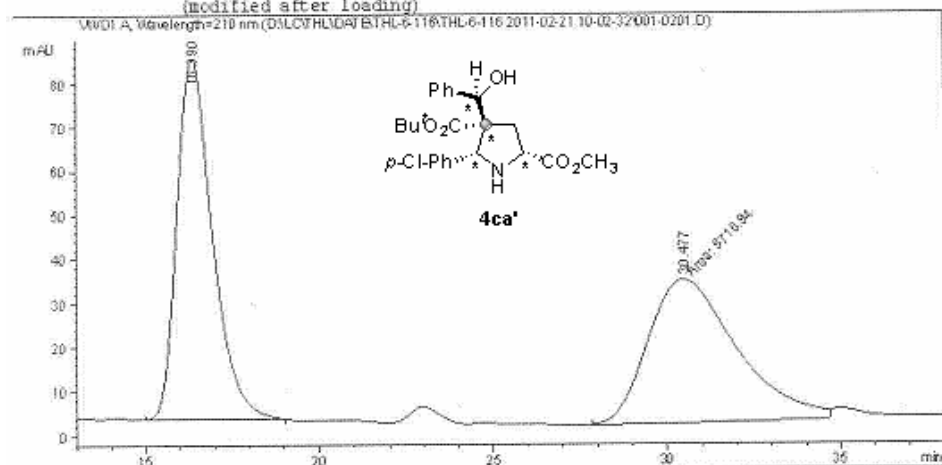

Area Percent Report

```

=====
Sorted By      :      Signal
Multiplier     :      1.0000
Dilution       :      1.0000
See Multiplier & Dilution Factor with ISTDs
    
```

Signal 1: WVD1 A, Wavelength=210 nm

| Peak #   | RetTime [min] | Type | Width [min] | Area mAU   | Area %    | Height [mAU] | Area %  |
|----------|---------------|------|-------------|------------|-----------|--------------|---------|
| 1        | 16.390        | EB   | 1.0747      | 5878.61084 | 50.6971   | 82.04626     | 50.6971 |
| 2        | 30.477        | MF   | 2.9445      | 5716.93848 | 49.3029   | 32.35960     | 49.3029 |
| Totals : |               |      |             | 1.15955e4  | 114.40586 |              |         |

\*\*\* End of Report \*\*\*

Instrument 1 2/21/2011 11:00:43 AM LTL

Page 1 of 1
